# Supplementary material for: Tailoring the pore size of expanded porphyrinoids for lanthanide selectivity
Source: Royal Society of Chemistry journal article supplement (doi:10.1039/d3ra05710k), 2023-01-01
Supplement: d3ra05710k1.pdf [file d3ra05710k1.pdf]

# Modifying Macrocycles for Lanthanide Selectivity

Thomas Malcomson,<sup>\*,†</sup> Lewis Edwards-Yates,<sup>‡</sup> and Andrew Kerridge<sup>\*,¶</sup>

<sup>†</sup>*Department of Chemistry, School of Natural Sciences, The University of Manchester,  
Manchester, M13 9PL, UK.*

<sup>‡</sup>*Department of Chemistry & Earth Sciences, Priestley College, Loushers Lane,  
Warrington, Cheshire, WA4 6RD, UK.*

<sup>¶</sup>*Department of Chemistry, Lancaster University, Lancaster, LA1 4YB, UK; E-mail:  
a.kerridge@lancaster.ac.uk*

E-mail: thomas.malcomson@manchester.ac.uk; a.kerridge@lancaster.ac.uk

# Energetics

Table S1: Circular approximation of macrocyclic core size ( $\text{\AA}$ ) by approximating the circle as a regular polygon with the average N-N bond length as the sides and with the N atoms as the vertices. The circumradii (*i.e.* the radius of the unique circle intersecting the N atoms), denoted by  $\Gamma$ , are recorded in the table (first row) with their standard deviations (second row). <sup>a</sup> Ionic radii obtained from Shannon *et al.*<sup>1</sup>

|                           |       | La    | <sup>8</sup> Gd | Lu    |
|---------------------------|-------|-------|-----------------|-------|
| Ionic radius <sup>a</sup> |       | 1.216 | 1.053           | 0.977 |
| Pent0                     | 2.704 | 2.236 | 2.193           | 2.160 |
|                           | 0.000 | 0.010 | 0.004           | 0.003 |
| Porph1212                 | 2.442 | 2.275 | 2.248           | 2.497 |
|                           | 0.033 | 0.043 | 0.052           | 0.076 |
| Porph1122                 | 2.463 | 2.524 | 2.277           | 2.222 |
|                           | 0.247 | 0.318 | 0.166           | 0.157 |
| Sapphyrin                 | 2.696 | 2.660 | 2.601           | 2.504 |
|                           | 0.199 | 0.199 | 0.185           | 0.141 |
| Porph2                    | 2.706 | 2.369 | 2.329           | 2.266 |
|                           | 0.001 | 0.194 | 0.240           | 0.253 |
| Amethyryn                 | 2.850 | 2.808 | 2.764           | 2.777 |
|                           | 0.056 | 0.118 | 0.061           | 0.047 |
| Isoamethyryn              | 2.868 | 2.811 | 2.760           | 2.751 |
|                           | 0.171 | 0.164 | 0.142           | 0.133 |
| Pent1                     | 3.389 | 2.755 | 2.604           | 2.537 |
|                           | 0.000 | 0.033 | 0.055           | 0.059 |
| Rosarin                   | 3.076 | 2.956 | 2.770           | 2.715 |
|                           | 0.154 | 0.106 | 0.064           | 0.060 |
| Rubyryn                   | 3.256 | 2.990 | 2.800           | 2.748 |
|                           | 0.187 | 0.114 | 0.094           | 0.085 |
| Hex1                      | 3.643 | 3.000 | 2.867           | 2.807 |
|                           | 0.006 | 0.040 | 0.012           | 0.011 |

Table S2: Energies of the distorted and optimised geometries of each macrocycle (*Hartrees*) and the required energy change (*kcal mol<sup>-1</sup>*) associated with the extended porphyrinoid binding of the La(III) ion.

| Macrocycle   | Distorted Geometry | Optimised Geometry | Energy Difference |
|--------------|--------------------|--------------------|-------------------|
| Pent0        | -1041.238942       | -1041.247978       | 5.669535137       |
| Porph1212    | -1065.363216       | -1065.371932       | 5.468297647       |
| Porph1122    | -1065.351715       | -1065.360132       | 5.280496784       |
| Sapphyrin    | -1196.157757       | -1196.164861       | 4.456969367       |
| Porph2       | -1142.689411       | -1142.705027       | 9.796897579       |
| Amethyryn    | -1327.241462       | -1327.248307       | 4.294762561       |
| Isoamethyryn | -1327.239594       | -1327.245783       | 3.882640759       |
| Pent1        | -1234.991549       | -1235.008065       | 10.3618938        |
| Rosarin      | -1365.812742       | -1365.834258       | 13.49889131       |
| Rubyryn      | -1404.605585       | -1404.643239       | 23.62335171       |
| Hex1         | -1481.917453       | -1481.978783       | 38.47719538       |

Table S3: Energies of the distorted and optimised geometries of each macrocycle (*Hartrees*) and the required energy change (*kcal mol<sup>-1</sup>*) associated with the extended porphyrinoid binding of the Gd(III) ion.

| Macrocycle   | Distorted Geometry | Optimised Geometry | Energy Difference |
|--------------|--------------------|--------------------|-------------------|
| Pent0        | -1041.233734       | -1041.247978       | 8.936459705       |
| Porph1212    | -1065.361289       | -1065.371932       | 6.677081347       |
| Porph1122    | -1065.34212        | -1065.360132       | 11.30067381       |
| Sapphyrin    | -1196.149436       | -1196.164861       | 9.677279388       |
| Porph2       | -1142.685771       | -1142.705027       | 12.08057361       |
| Amethyryn    | -1327.233601       | -1327.248307       | 9.226652616       |
| Isoamethyryn | -1327.224306       | -1327.245783       | 13.47439136       |
| Pent1        | -1234.964758       | -1235.008065       | 27.17010999       |
| Rosarin      | -1365.739131       | -1365.834258       | 59.68109216       |
| Rubyryn      | -1404.548197       | -1404.643239       | 59.62789081       |
| Hex1         | -1481.881896       | -1481.978783       | 60.78491306       |

Table S4: Energies of the distorted and optimised geometries of each macrocycle (*Hartrees*) and the required energy change (*kcal mol<sup>-1</sup>*) associated with the extended porphyrinoid binding of the Lu(III) ion.

| Macrocycle   | Distorted Geometry | Optimised Geometry | Energy Difference |
|--------------|--------------------|--------------------|-------------------|
| Pent0        | -1041.228613       | -1041.247978       | 12.14950772       |
| Porph1212    | -1065.35666        | -1065.371932       | 9.581465763       |
| Porph1122    | -1065.336119       | -1065.360132       | 15.06510419       |
| Sapphyrin    | -1196.121517       | -1196.164861       | 27.1927325        |
| Porph2       | -1142.678648       | -1142.705027       | 16.54956414       |
| Amethyrin    | -1327.236768       | -1327.248307       | 7.239551793       |
| Isoamethyrin | -1327.217915       | -1327.245783       | 17.48357215       |
| Pent1        | -1234.94993        | -1235.008065       | 36.47292275       |
| Rosarin      | -1365.709596       | -1365.834258       | 78.21037673       |
| Rubyrin      | -1404.52547        | -1404.643239       | 73.88598886       |
| Hex1         | -1481.863645       | -1481.978783       | 72.23550253       |

Table S5: Energy changes ( $kcal\ mol^{-1}$ ) for the exchange reactions in which the smaller ion replaces the larger ion within the EP macrocycle. As such, negative reaction energies denote a preference for EP complexation with the smaller ion, while positive reaction energies denote selectivity preference for EP complexation of the larger ion.

|               | La $\rightarrow$ Gd | Gd $\rightarrow$ Lu | La $\rightarrow$ Lu |
|---------------|---------------------|---------------------|---------------------|
| Pent0         | -14.79              | -21.18              | -6.39               |
| Porph1212     | -10.01              | -11.79              | -1.78               |
| Porph1122     | -20.30              | -19.47              | -0.83               |
| Sapphyrin     | -3.31               | -4.98               | -1.66               |
| Porph2        | -5.52               | -1.42               | 4.10                |
| Amethyirin    | 11.84               | 16.98               | 5.14                |
| Isoamethyirin | 14.77               | 24.59               | 9.82                |
| Pent1         | -0.69               | -0.65               | 0.04                |
| Rosarin       | 4.49                | 9.11                | 4.62                |
| Rubyirin      | 13.02               | 20.91               | 7.89                |
| Hex1          | 6.09                | 10.44               | 4.35                |

Table S6: Calculated energies (*Hartrees*) for each lanthanum complex, including free energy correction utilising the BHLYP/TZVP<sub>COSMO</sub> model chemistry.

| La           | TZ(COSMO)    | Free energy Corr | Total        |
|--------------|--------------|------------------|--------------|
| Nitrate      | -1101.955419 | 0.070617143      | -1101.884802 |
| Pent0        | -1379.043032 | 0.308            | -1378.735032 |
| Porph1212    | -1606.796001 | 0.345814684      | -1606.450187 |
| Porph1122    | -1606.763791 | 0.346728883      | -1606.417062 |
| Sapphyrin    | -1533.905271 | 0.371324636      | -1533.533946 |
| Porph2       | -1684.111836 | 0.37693553       | -1683.7349   |
| Amethyrin    | -1715.837418 | 0.331013333      | -1715.506404 |
| Isoamethyrin | -1715.834256 | 0.331165714      | -1715.503091 |
| Pent1        | -1700.010603 | 0.352049524      | -1699.658554 |
| Rosarin      | -1627.074323 | 0.382062661      | -1626.692261 |
| Rubyrin      | -1793.176166 | 0.36513094       | -1792.811035 |
| Hex1         | -1870.531515 | 0.395619048      | -1870.135896 |

Table S7: Calculated energies (*Hartrees*) for each gadolinium complex, including free energy correction utilising the BHLYP/TZVP<sub>COSMO</sub> model chemistry.

| Gd           | TZ(COSMO)    | Free energy Corr | Total        |
|--------------|--------------|------------------|--------------|
| Nitrate      | -1759.310262 | 0.049687619      | -1759.260575 |
| Pent0        | -2036.41933  | 0.284952381      | -2036.134378 |
| Porph1212    | -2264.165976 | 0.324071993      | -2263.841904 |
| Porph1122    | -2264.146062 | 0.320872298      | -2263.82519  |
| Sapphyrin    | -2191.266184 | 0.351189411      | -2190.914995 |
| Porph2       | -2341.473887 | 0.354423388      | -2341.119464 |
| Amethyrin    | -2373.170111 | 0.306807619      | -2372.863303 |
| Isoamethyrin | -2373.163375 | 0.308049524      | -2372.855325 |
| Pent1        | -2357.366709 | 0.33128381       | -2357.035426 |
| Rosarin      | -2284.416701 | 0.35582516       | -2284.060876 |
| Rubyrin      | -2450.508484 | 0.342424531      | -2450.16606  |
| Hex1         | -2527.874358 | 0.372392381      | -2527.501966 |



Table S8: Calculated energies (*Hartrees*) for each lutetium complex, including free energy correction utilising the BHLYP/TZVP<sub>COSMO</sub> model chemistry.

| Lu           | TZ(COSMO)    | Free energy Corr | Total        |
|--------------|--------------|------------------|--------------|
| Nitrate      | -2229.46887  | 0.054510476      | -2229.41436  |
| Pent0        | -2506.585437 | 0.287097143      | -2506.29834  |
| Porph1212    | -2734.324289 | 0.325759451      | -2733.99853  |
| Porph1122    | -2734.300675 | 0.323020665      | -2733.977654 |
| Sapphyrin    | -2661.42215  | 0.350717075      | -2661.071433 |
| Porph2       | -2811.625473 | 0.358754404      | -2811.266718 |
| Amethyrin    | -2843.317592 | 0.308693333      | -2843.008899 |
| Isoamethyrin | -2843.302268 | 0.3088           | -2842.993468 |
| Pent1        | -2827.52203  | 0.33288          | -2827.18915  |
| Rosarin      | -2754.564413 | 0.357120274      | -2754.207292 |
| Rubyrin      | -2920.650445 | 0.343178745      | -2920.307267 |
| Hex1         | -2998.022323 | 0.373500952      | -2997.648822 |

# Geometries

## Macrocycles

Table S9: Optimised geometry of the **pent0** macrocycle with the BHLYP/def2-SVP model chemistry.

| Atom | X            | Y            | Z            |
|------|--------------|--------------|--------------|
| C    | -2.765649200 | -0.956280400 | -0.758707500 |
| C    | -3.711018600 | -0.513886300 | 0.242116200  |
| C    | -3.644864500 | 0.865964300  | 0.241871300  |
| C    | -2.661637500 | 1.215569200  | -0.759188300 |
| N    | -2.265709800 | 0.108018800  | -1.395318100 |
| H    | -4.271229900 | -1.139599800 | 0.934407000  |
| H    | -4.142686400 | 1.542601200  | 0.933998200  |
| C    | -1.967692800 | -2.173078800 | -0.738054000 |
| C    | -1.955568100 | -3.193974800 | 0.285983200  |
| N    | -0.781861500 | -2.152734000 | -1.355557100 |
| C    | -0.664030600 | -3.683147300 | 0.317869400  |
| H    | -2.764169300 | -3.443513100 | 0.970496400  |
| C    | 0.065214300  | -2.943127300 | -0.687906900 |
| H    | -0.253841100 | -4.394246400 | 1.032562100  |
| C    | -1.751127700 | 2.350600700  | -0.739401200 |
| C    | -1.640929800 | 3.365455900  | 0.284842700  |
| N    | -0.573107600 | 2.217389900  | -1.357919200 |
| C    | -0.308611000 | 3.729192900  | 0.315811700  |
| H    | -2.421576600 | 3.690353600  | 0.970146600  |
| C    | 0.345967500  | 2.923105400  | -0.690598200 |
| H    | 0.168350800  | 4.397345000  | 1.030478200  |

|   |             |              |              |
|---|-------------|--------------|--------------|
| C | 1.706469300 | 2.407705700  | -0.657006200 |
| C | 2.686553700 | 2.594672000  | 0.389753100  |
| N | 1.955557300 | 1.259540900  | -1.295522400 |
| C | 3.443826500 | 1.439474800  | 0.410313700  |
| H | 2.741304400 | 3.422741000  | 1.093972800  |
| C | 2.898473000 | 0.589428600  | -0.624685200 |
| H | 4.213514800 | 1.177161200  | 1.133783100  |
| C | 1.468756900 | -2.560182600 | -0.654275800 |
| C | 2.425478900 | -2.838039500 | 0.393893400  |
| N | 1.827082400 | -1.442350300 | -1.294622500 |
| C | 3.289718600 | -1.760531800 | 0.413217700  |
| H | 2.399904900 | -3.666040200 | 1.099851700  |
| C | 2.828996300 | -0.864136500 | -0.623803300 |
| H | 4.080142200 | -1.571451900 | 1.137197600  |

Table S10: Optimised geometry of the **porph1212** macrocycle with the BHLYP/def2-SVP model chemistry.

| Atom | X            | Y            | Z            |
|------|--------------|--------------|--------------|
| C    | 3.222673700  | 1.439225600  | 0.105367300  |
| C    | 4.600904600  | 1.032167900  | 0.268530000  |
| C    | 4.569857500  | -0.322151400 | 0.421633200  |
| C    | 3.181412400  | -0.694969200 | 0.347013000  |
| N    | 2.402949000  | 0.410211100  | 0.154288400  |
| H    | 5.464913000  | 1.689278100  | 0.266065700  |
| H    | 5.401747400  | -1.003406100 | 0.570275800  |
| C    | 0.392666700  | 3.489967200  | -0.365320800 |
| C    | -0.419167000 | 4.670000300  | -0.565895700 |
| N    | -0.342083200 | 2.399275200  | -0.303847400 |
| C    | -1.706952600 | 4.226338000  | -0.623581200 |
| H    | -0.054277300 | 5.688870700  | -0.649999000 |
| C    | -1.639018800 | 2.798045500  | -0.457111700 |
| H    | -2.614165900 | 4.805485300  | -0.764396800 |
| C    | 1.639023600  | -2.798052300 | 0.457048100  |
| C    | 1.706788400  | -4.226114900 | 0.625547100  |
| N    | 0.342219000  | -2.399460800 | 0.302218300  |
| C    | 0.419042000  | -4.669830700 | 0.567401700  |
| H    | 2.613857700  | -4.805066100 | 0.768087100  |
| C    | -0.392599200 | -3.490059900 | 0.364517700  |
| H    | 0.054055700  | -5.688569700 | 0.652671400  |
| C    | -3.181395200 | 0.694945400  | -0.347233200 |
| C    | -4.569969500 | 0.322303200  | -0.420309900 |
| N    | -2.402774600 | -0.410447400 | -0.156373700 |

|   |              |              |              |
|---|--------------|--------------|--------------|
| C | -4.600920400 | -1.032145500 | -0.268336500 |
| H | -5.402004900 | 1.003754000  | -0.567229900 |
| C | -3.222525400 | -1.439425700 | -0.107128600 |
| H | -5.464980400 | -1.689184900 | -0.265242500 |
| C | 2.808458800  | -2.035079300 | 0.468799100  |
| H | 3.683935100  | -2.669501800 | 0.615489400  |
| C | -2.921623900 | -2.852875600 | 0.079074500  |
| C | -1.838345500 | -3.637822800 | 0.259567500  |
| H | -3.849488700 | -3.428598800 | 0.066655100  |
| H | -2.105796600 | -4.692076400 | 0.357344000  |
| C | 1.838527200  | 3.637575600  | -0.261734400 |
| C | 2.921850800  | 2.852568400  | -0.081773300 |
| H | 2.106010400  | 4.691784600  | -0.359903400 |
| H | 3.849776300  | 3.428209000  | -0.070080000 |
| C | -2.808490200 | 2.035121600  | -0.468439000 |
| H | -3.684090000 | 2.669712400  | -0.613657300 |

Table S11: Optimised geometry of the **porph1122** macrocycle with the BHLYP/def2-SVP model chemistry.

| Atom | X            | Y            | Z            |
|------|--------------|--------------|--------------|
| C    | 3.004822200  | 1.692515400  | 0.139902800  |
| C    | 4.419323500  | 1.584399300  | 0.313283900  |
| C    | 4.673812300  | 0.246159500  | 0.483598700  |
| C    | 3.403369300  | -0.404167200 | 0.408442500  |
| N    | 2.415765800  | 0.485020300  | 0.201557000  |
| H    | 5.128290600  | 2.407141800  | 0.306435900  |
| H    | 5.631596200  | -0.240048200 | 0.644311700  |
| C    | -0.113615000 | 3.440727200  | -0.423274000 |
| C    | -1.003188600 | 4.581281500  | -0.677319100 |
| N    | -0.780943700 | 2.322634600  | -0.357124100 |
| C    | -2.250900200 | 4.071631900  | -0.758564600 |
| H    | -0.691648100 | 5.616016900  | -0.775285600 |
| C    | -2.109283500 | 2.639683200  | -0.555207900 |
| H    | -3.185569900 | 4.592962200  | -0.937344900 |
| C    | 1.150164300  | -3.235049800 | 0.492188400  |
| C    | 0.739604300  | -4.639357300 | 0.618823500  |
| N    | 0.123340200  | -2.454722800 | 0.300977800  |
| C    | -0.604606900 | -4.648960800 | 0.491810100  |
| H    | 1.405820800  | -5.480086500 | 0.782074600  |
| C    | -0.994528800 | -3.263747700 | 0.289203200  |
| H    | -1.282644000 | -5.495346800 | 0.527026100  |
| C    | -3.368924300 | 0.405870900  | -0.409280300 |
| C    | -4.652003700 | -0.239378100 | -0.459380600 |
| N    | -2.391199800 | -0.479469900 | -0.195700800 |

|   |              |              |              |
|---|--------------|--------------|--------------|
| C | -4.400542500 | -1.573264600 | -0.262936600 |
| H | -5.609461000 | 0.246630600  | -0.619690700 |
| C | -2.976135100 | -1.677289400 | -0.103693300 |
| H | -5.111776700 | -2.392891400 | -0.231831900 |
| C | 2.567211500  | -2.925982700 | 0.593218600  |
| C | 3.387642000  | -1.843165200 | 0.558468100  |
| H | 3.126431300  | -3.850540700 | 0.747695700  |
| H | 4.422501700  | -2.165151100 | 0.695768800  |
| C | -2.308765800 | -2.914357900 | 0.116990900  |
| H | -2.990500800 | -3.764959800 | 0.154356900  |
| C | 1.309606600  | 3.702524800  | -0.283144400 |
| C | 2.463928900  | 3.018213000  | -0.068507900 |
| H | 1.489163200  | 4.774488200  | -0.383233900 |
| H | 3.303334900  | 3.717035800  | -0.045722500 |
| C | -3.199676900 | 1.809186100  | -0.572019800 |
| H | -4.139814100 | 2.333815000  | -0.746872400 |

Table S12: Optimised geometry of the **sapphyrin** macrocycle with the BHLYP/def2-SVP model chemistry.

| Atom | X            | Y            | Z            |
|------|--------------|--------------|--------------|
| C    | 0.180796600  | -2.444305100 | 2.792541100  |
| C    | 0.235803300  | -3.876446200 | 2.979581000  |
| C    | 0.211850500  | -4.421562500 | 1.718416700  |
| C    | 0.143148100  | -3.299825100 | 0.808436500  |
| N    | 0.126875300  | -2.159052800 | 1.474411100  |
| H    | 0.285505300  | -4.402351400 | 3.931212500  |
| H    | 0.238532500  | -5.474707000 | 1.451600400  |
| C    | 0.182640200  | -1.491708100 | 3.825492100  |
| H    | 0.231286800  | -1.914060800 | 4.832212000  |
| C    | 0.132704400  | -0.091838800 | 3.794298800  |
| C    | 0.146118500  | 0.711649200  | 5.003428500  |
| N    | 0.067097700  | 0.713633100  | 2.707059100  |
| C    | 0.086557200  | 2.008989900  | 4.593011800  |
| H    | 0.194497400  | 0.330909700  | 6.021459000  |
| C    | 0.037687400  | 1.971020800  | 3.133986700  |
| H    | 0.076303600  | 2.906227300  | 5.208208300  |
| C    | -0.030700700 | 3.170847300  | 2.368132600  |
| H    | -0.040762900 | 4.068696200  | 2.989791300  |
| C    | -0.087288500 | 3.450416600  | 0.999899300  |
| C    | -0.151219700 | 4.851453700  | 0.551542500  |
| N    | -0.095217300 | 2.631834700  | -0.066504700 |
| C    | -0.195828700 | 4.815899100  | -0.795668500 |
| H    | -0.159182800 | 5.722306500  | 1.203056100  |
| C    | -0.159161600 | 3.393113200  | -1.172841400 |



|   |              |              |              |
|---|--------------|--------------|--------------|
| H | -0.248413700 | 5.651171100  | -1.490239600 |
| C | -0.192431100 | 3.041697500  | -2.525011300 |
| H | -0.245012300 | 3.905532300  | -3.191097200 |
| C | -0.172652500 | 1.803044900  | -3.229442400 |
| C | -0.219964800 | 1.763856900  | -4.688322700 |
| N | -0.113122600 | 0.569928300  | -2.739541700 |
| C | -0.185263300 | 0.446456200  | -5.032718100 |
| H | -0.272290700 | 2.627285600  | -5.348087100 |
| C | -0.117685500 | -0.291892100 | -3.784673600 |
| H | -0.203312600 | 0.012475200  | -6.030222700 |
| C | 0.095214200  | -3.337934600 | -0.640803300 |
| C | 0.105353000  | -4.506289200 | -1.493029800 |
| N | 0.033333300  | -2.233874100 | -1.363369400 |
| C | 0.045289600  | -4.028437000 | -2.779895100 |
| H | 0.151097800  | -5.543907900 | -1.173250500 |
| C | 0.000528400  | -2.588238000 | -2.665385100 |
| H | 0.032953900  | -4.603670700 | -3.703802300 |
| C | -0.067366400 | -1.691646700 | -3.744938400 |
| H | -0.084297300 | -2.166697000 | -4.728932400 |

Table S13: Optimised geometry of the **porph2** macrocycle with the BHLYP/def2-SVP model chemistry.

| Atom | X            | Y            | Z            |
|------|--------------|--------------|--------------|
| C    | 3.143692200  | 1.647822500  | 0.626570300  |
| C    | 4.241461500  | 1.609722800  | 1.581940900  |
| C    | 4.352541900  | 0.318881100  | 1.965529900  |
| C    | 3.340285600  | -0.408902800 | 1.212756200  |
| N    | 2.617144700  | 0.427287200  | 0.454419700  |
| H    | 4.832101100  | 2.463750200  | 1.896182500  |
| H    | 5.060207100  | -0.123021500 | 2.659056600  |
| C    | 0.614414500  | 3.308484400  | -1.215463400 |
| C    | 0.038560300  | 4.289225300  | -2.124650100 |
| N    | -0.347931500 | 2.597746400  | -0.609225900 |
| C    | -1.301332100 | 4.174056100  | -1.992159400 |
| H    | 0.600996700  | 4.981464600  | -2.742239300 |
| C    | -1.515224300 | 3.104277900  | -1.028389200 |
| H    | -2.082739100 | 4.745225600  | -2.482179200 |
| C    | 1.606625800  | -3.227297800 | -0.055494300 |
| C    | 1.531516700  | -4.489170400 | -0.776470700 |
| N    | 0.395277400  | -2.661725200 | 0.046259400  |
| C    | 0.228253200  | -4.656581100 | -1.093226900 |
| H    | 2.371265500  | -5.140739700 | -0.994143500 |
| C    | -0.468638900 | -3.508120100 | -0.531884600 |
| H    | -0.239615600 | -5.480232500 | -1.622224900 |
| C    | -3.485623300 | 0.607640700  | 0.533965100  |
| C    | -4.619968500 | 0.046486400  | 1.253045700  |
| N    | -2.664598100 | -0.362691500 | 0.106409200  |

|   |              |              |              |
|---|--------------|--------------|--------------|
| C | -4.472237300 | -1.295536900 | 1.187238700  |
| H | -5.422856700 | 0.617722400  | 1.707030700  |
| C | -3.235001600 | -1.523864000 | 0.456031500  |
| H | -5.122337700 | -2.069333100 | 1.581904600  |
| C | 2.833829200  | -2.892524900 | 0.566772900  |
| C | 3.428418900  | -1.821692000 | 1.202600900  |
| H | 3.481035400  | -3.772171600 | 0.597234900  |
| H | 4.316978700  | -2.137591500 | 1.752585700  |
| C | -2.928657900 | -2.852961000 | 0.071658800  |
| C | -1.881942000 | -3.573654400 | -0.464769800 |
| H | -3.814657000 | -3.481350400 | 0.189443100  |
| H | -2.220578700 | -4.548044700 | -0.822330300 |
| C | 1.997516400  | 3.413894000  | -0.936024100 |
| C | 2.928596200  | 2.852049100  | -0.086078400 |
| H | 2.408763600  | 4.288547600  | -1.443581600 |
| H | 3.792730600  | 3.509347500  | 0.034985500  |
| C | -3.543262800 | 1.981698900  | 0.197761600  |
| C | -2.833330800 | 2.895726300  | -0.552978800 |
| H | -4.502683700 | 2.396028400  | 0.513440200  |
| H | -3.458995600 | 3.750121700  | -0.821310400 |

Table S14: Optimised geometry of the **amethyrin** macrocycle with the BHLYP/def2-SVP model chemistry.

| Atom | X            | Y            | Z            |
|------|--------------|--------------|--------------|
| C    | 2.955424000  | -2.867068600 | 0.066041900  |
| C    | 3.016460500  | -4.329538900 | 0.075939100  |
| C    | 1.728570300  | -4.756687000 | 0.043800400  |
| C    | 0.911980700  | -3.543708200 | 0.014583800  |
| N    | 1.679620500  | -2.464673900 | 0.028274900  |
| H    | 3.917727400  | -4.933696000 | 0.104343400  |
| H    | 1.367413500  | -5.778867900 | 0.040540800  |
| C    | 4.071395200  | -0.610120000 | 0.095959500  |
| C    | 5.270295000  | 0.228611500  | 0.138360800  |
| N    | 2.977606700  | 0.160183400  | 0.061023800  |
| C    | 4.828168200  | 1.511788300  | 0.128153800  |
| H    | 6.297111400  | -0.121503500 | 0.172118300  |
| C    | 3.369040100  | 1.425173600  | 0.079057900  |
| H    | 5.421080500  | 2.419077400  | 0.151788200  |
| C    | 2.433896800  | 2.498108100  | 0.055310100  |
| C    | 2.703555400  | 3.930706200  | 0.074791200  |
| N    | 1.124378800  | 2.272979500  | 0.013593900  |
| C    | 1.483015500  | 4.534869600  | 0.042998900  |
| H    | 3.676941800  | 4.407223500  | 0.108399300  |
| C    | 0.508589100  | 3.451081100  | 0.005373800  |
| H    | 1.270875300  | 5.598225700  | 0.045786500  |
| C    | -0.911471300 | 3.543805500  | -0.031345900 |
| C    | -1.728456400 | 4.756777300  | -0.042863500 |
| N    | -1.678848800 | 2.464764600  | -0.056864600 |

|   |              |              |              |
|---|--------------|--------------|--------------|
| C | -3.016395900 | 4.329704700  | -0.076138200 |
| H | -1.367592100 | 5.778949600  | -0.027378800 |
| H | -3.917940800 | 4.933948700  | -0.093106100 |
| C | -0.508083500 | -3.451149900 | -0.020284200 |
| C | -1.483090300 | -4.534967800 | -0.032402100 |
| N | -1.123636200 | -2.273012500 | -0.042559000 |
| C | -2.703763800 | -3.930897500 | -0.061976500 |
| H | -1.271284000 | -5.598320900 | -0.019369500 |
| H | -3.677599300 | -4.407512100 | -0.077846100 |
| C | -2.433577900 | -2.498242600 | -0.067162600 |
| C | -2.955029200 | 2.867257600  | -0.083375100 |
| C | -5.270723400 | -0.228612800 | -0.128060800 |
| C | -4.828619900 | -1.511846300 | -0.115644200 |
| C | -4.071262100 | 0.610136200  | -0.109598200 |
| H | -6.297981900 | 0.121490200  | -0.146521100 |
| C | -3.368884500 | -1.425289800 | -0.090604700 |
| N | -2.976973200 | -0.160245300 | -0.088788000 |
| H | -5.422020000 | -2.419148900 | -0.122089700 |
| C | 4.065520700  | -2.011800700 | 0.096482900  |
| C | -4.065288600 | 2.011896700  | -0.109037000 |
| H | 5.041541700  | -2.494807800 | 0.127568800  |
| H | -5.041686000 | 2.494960000  | -0.127276100 |

Table S15: Optimised geometry of the **isoamethyrin** macrocycle with the BHLYP/def2-SVP model chemistry.

| Atom | X            | Y            | Z            |
|------|--------------|--------------|--------------|
| C    | 3.820871000  | -0.325336400 | -0.055466200 |
| C    | 5.082839300  | -1.031964100 | -0.078692300 |
| C    | 4.756796100  | -2.360806900 | -0.104378900 |
| C    | 3.307359400  | -2.413601900 | -0.094918900 |
| N    | 2.803412400  | -1.175428400 | -0.066224800 |
| H    | 6.075095400  | -0.593625900 | -0.076587200 |
| H    | 5.433812300  | -3.209202700 | -0.126713100 |
| C    | 3.546796500  | 1.085105300  | -0.022209200 |
| C    | 4.467515700  | 2.234710500  | 0.007958800  |
| N    | 2.307383300  | 1.498161900  | -0.009854000 |
| C    | 3.680912200  | 3.340591100  | 0.040430500  |
| H    | 5.551333500  | 2.197565700  | 0.005924400  |
| C    | 2.303578500  | 2.843326300  | 0.029416900  |
| H    | 3.997470500  | 4.377127600  | 0.069932500  |
| C    | 1.071810100  | 3.498576300  | 0.057955800  |
| C    | 0.715326300  | 4.917981700  | 0.106789300  |
| N    | -0.046762800 | 2.750236900  | 0.045871800  |
| C    | -0.641717600 | 4.952308200  | 0.123023000  |
| H    | 1.398637400  | 5.759559200  | 0.126366800  |
| C    | -1.081641900 | 3.546908400  | 0.084267000  |
| H    | -1.277612500 | 5.830117200  | 0.158569100  |
| C    | -2.405000500 | 2.985912600  | 0.088286600  |
| C    | -3.696194600 | 3.637320400  | 0.122287100  |
| N    | -2.541886400 | 1.667442600  | 0.059018100  |

|   |              |              |              |
|---|--------------|--------------|--------------|
| C | -4.616483900 | 2.624511200  | 0.111030300  |
| H | -3.886802000 | 4.704883400  | 0.150230000  |
| H | -5.698504400 | 2.711683900  | 0.128437800  |
| C | 1.143363200  | -3.760099100 | -0.099150500 |
| C | 0.510472200  | -5.068761000 | -0.119618000 |
| N | 0.188518500  | -2.788972300 | -0.067354100 |
| C | -0.827356300 | -4.839259800 | -0.099319300 |
| H | 1.024731300  | -6.024099400 | -0.145909600 |
| H | -1.624382200 | -5.573084900 | -0.105702000 |
| C | -0.979735400 | -3.387415300 | -0.066475600 |
| C | -3.850696500 | 1.393365500  | 0.071328500  |
| C | -4.490563700 | -2.408948200 | -0.002991100 |
| C | -3.552606300 | -3.389845300 | -0.035689900 |
| C | -3.758594300 | -1.153073600 | 0.015293700  |
| H | -5.570449500 | -2.516541500 | 0.007735300  |
| C | -2.263090100 | -2.704932100 | -0.036401600 |
| N | -2.419452500 | -1.401959600 | -0.006260800 |
| H | -3.716149400 | -4.460635200 | -0.056893400 |
| C | -4.384352200 | 0.088486200  | 0.049981000  |
| H | -5.473794000 | 0.041571900  | 0.063224400  |
| C | 2.522944600  | -3.585229300 | -0.110795500 |
| H | 3.092848900  | -4.514630700 | -0.135752500 |

Table S16: Optimised geometry of the **pent1** macrocycle with the BHLYP/def2-SVP model chemistry.

| Atom | X            | Y            | Z            |
|------|--------------|--------------|--------------|
| C    | 0.017022500  | -2.352380300 | 3.029225600  |
| C    | 0.004487800  | -3.727870600 | 3.529873100  |
| C    | -0.023169700 | -4.518174100 | 2.437795500  |
| C    | -0.026808900 | -3.612649800 | 1.287608100  |
| N    | -0.002534200 | -2.335963000 | 1.690248700  |
| H    | 0.015510600  | -4.018486100 | 4.575075700  |
| H    | -0.039545700 | -5.601788600 | 2.387091800  |
| C    | 0.046230400  | -1.289030700 | 3.940143200  |
| H    | 0.058819700  | -1.627710800 | 4.975529700  |
| C    | 0.062799300  | 0.107469100  | 3.833247200  |
| C    | 0.094922100  | 0.921244000  | 5.049540700  |
| N    | 0.052942500  | 0.885477800  | 2.743417500  |
| C    | 0.103590700  | 2.204352500  | 4.635304400  |
| H    | 0.108366500  | 0.537844900  | 6.064363500  |
| C    | 0.076430600  | 2.153601900  | 3.172627000  |
| H    | 0.125792400  | 3.108579800  | 5.234394200  |
| C    | 0.076926500  | 3.349138200  | 2.442655200  |
| H    | 0.097947500  | 4.229084300  | 3.084636700  |
| C    | 0.056224600  | 3.679208100  | 1.081867400  |
| C    | 0.061987800  | 5.087840300  | 0.683569600  |
| N    | 0.030562800  | 2.883136700  | 0.005180100  |
| C    | 0.038476400  | 5.090607700  | -0.664495500 |
| H    | 0.081212200  | 5.934613000  | 1.361537800  |
| C    | 0.019382200  | 3.683526800  | -1.068063300 |



|   |              |              |              |
|---|--------------|--------------|--------------|
| H | 0.034197800  | 5.940091200  | -1.339355400 |
| C | -0.005165300 | 3.358923900  | -2.430595500 |
| C | -0.051962300 | -4.145728900 | -0.007653700 |
| H | -0.067191200 | -5.235093900 | -0.009650800 |
| H | -0.007913200 | 4.241531300  | -3.069290300 |
| C | -0.025677000 | 2.166413300  | -3.164585900 |
| C | -0.045346700 | 2.223003700  | -4.627463200 |
| N | -0.030219200 | 0.896286400  | -2.740147900 |
| C | -0.060808100 | 0.941693300  | -5.046468700 |
| H | -0.046391400 | 3.129785300  | -5.223127600 |
| C | -0.051350100 | 0.122719400  | -3.832876100 |
| H | -0.077397000 | 0.562251400  | -6.062756300 |
| C | -0.061192600 | -3.607507300 | -1.300466500 |
| C | -0.085897400 | -4.508591100 | -2.454094700 |
| N | -0.050275000 | -2.328969500 | -1.698899300 |
| C | -0.088547700 | -3.714109000 | -3.543326000 |
| H | -0.098610100 | -5.592416600 | -2.407033600 |
| C | -0.066213800 | -2.340276000 | -3.037682700 |
| H | -0.104205200 | -4.000324900 | -4.589706900 |
| C | -0.065679700 | -1.273333900 | -3.945266800 |
| H | -0.081731400 | -1.608018900 | -4.981926100 |

Table S17: Optimised geometry of the **rosarin** macrocycle with the BHLYP/def2-SVP model chemistry.

| Atom | X            | Y            | Z            |
|------|--------------|--------------|--------------|
| C    | 2.253886600  | 3.147915700  | -0.083448400 |
| C    | 2.535972400  | 4.566161700  | -0.131967500 |
| C    | 1.314443200  | 5.186378100  | -0.176107800 |
| C    | 0.333690900  | 4.132119700  | -0.153428200 |
| N    | 0.960148200  | 2.921732800  | -0.097203900 |
| H    | 3.516119300  | 5.032317200  | -0.132774600 |
| H    | 1.107628500  | 6.252979900  | -0.219443000 |
| C    | -1.045240800 | 4.361657400  | -0.185739300 |
| H    | -1.299722100 | 5.423481100  | -0.231159600 |
| C    | -2.170426200 | 3.531148000  | -0.173027300 |
| C    | -3.522174900 | 4.025498600  | -0.216615500 |
| N    | -2.179984600 | 2.168336400  | -0.119633400 |
| C    | -4.329756500 | 2.918156700  | -0.187882000 |
| H    | -3.821549400 | 5.069772100  | -0.263018300 |
| C    | -3.435600000 | 1.782552200  | -0.127026800 |
| H    | -5.414572800 | 2.888829000  | -0.206554000 |
| C    | -3.853402900 | 0.375046800  | -0.078468200 |
| C    | -5.223243500 | -0.090628900 | -0.082544600 |
| N    | -3.011282300 | -0.631485100 | -0.024751800 |
| C    | -5.150653200 | -1.458252100 | -0.026814600 |
| H    | -6.116656400 | 0.524410200  | -0.121659800 |
| C    | -3.747280300 | -1.779450600 | 0.008669600  |
| H    | -5.971715600 | -2.170952200 | -0.011694800 |
| C    | 3.264475400  | 2.083362600  | -0.025675500 |

|   |              |              |              |
|---|--------------|--------------|--------------|
| C | 4.696153700  | 2.290045000  | -0.008549200 |
| N | 2.970142900  | 0.803918900  | 0.017971800  |
| C | 5.251416700  | 1.037999800  | 0.049067400  |
| H | 5.213853200  | 3.243580700  | -0.035938300 |
| C | 4.146317100  | 0.114956900  | 0.064925800  |
| H | 6.306238300  | 0.775652400  | 0.077763000  |
| C | 4.302692200  | -1.273730800 | 0.120684900  |
| C | -3.257529400 | -3.087861100 | 0.067415400  |
| H | 5.350204600  | -1.583841800 | 0.150152100  |
| H | -4.050574200 | -3.839572000 | 0.083956700  |
| C | 3.413511700  | -2.352568100 | 0.146882300  |
| C | 3.836138100  | -3.728025400 | 0.205070600  |
| N | 2.051110300  | -2.290224200 | 0.122488300  |
| C | 2.687278700  | -4.475510000 | 0.214288200  |
| H | 4.863906400  | -4.081747400 | 0.234738100  |
| C | 1.599538500  | -3.522963100 | 0.161198800  |
| H | 2.600556200  | -5.556686900 | 0.253230600  |
| C | -1.975910200 | -3.646092800 | 0.109274700  |
| C | -1.729211100 | -5.063600800 | 0.166266300  |
| N | -0.790155400 | -2.972213100 | 0.102843500  |
| C | -0.366280600 | -5.208364100 | 0.192986000  |
| H | -2.484601500 | -5.845519800 | 0.183539300  |
| C | 0.171224600  | -3.865998600 | 0.151293200  |
| H | 0.200876200  | -6.132721200 | 0.236420300  |

Table S18: Optimised geometry of the **rubyrin** macrocycle with the BHLYP/def2-SVP model chemistry.

| Atom | X            | Y            | Z            |
|------|--------------|--------------|--------------|
| C    | 2.253054800  | 3.846198200  | -0.054459900 |
| C    | 2.273040400  | 5.286538300  | -0.089810400 |
| C    | 0.964920100  | 5.672473000  | -0.116976200 |
| C    | 0.198756000  | 4.452326700  | -0.097583800 |
| N    | 0.998257400  | 3.378525400  | -0.060199500 |
| H    | 3.159740400  | 5.911526600  | -0.093292400 |
| H    | 0.560065500  | 6.678482800  | -0.147191200 |
| C    | -1.221822800 | 4.493272800  | -0.118112800 |
| H    | -1.590736700 | 5.518809200  | -0.146549800 |
| C    | -2.244733500 | 3.575574100  | -0.111498300 |
| C    | -3.632451500 | 4.000252900  | -0.140000100 |
| N    | -2.179087500 | 2.202649600  | -0.079802700 |
| C    | -4.371842200 | 2.867289200  | -0.124392800 |
| H    | -3.977560300 | 5.028038200  | -0.167955200 |
| C    | -3.409639200 | 1.769596600  | -0.086680900 |
| H    | -5.450565500 | 2.781475500  | -0.137311800 |
| C    | 3.468169900  | 3.109485700  | -0.018121700 |
| H    | 4.335223100  | 3.770424600  | -0.020014800 |
| C    | -3.824601000 | 0.365007900  | -0.060715200 |
| C    | -5.229237600 | -0.034297200 | -0.067975700 |
| N    | -3.026763600 | -0.666581300 | -0.029374600 |
| C    | -5.224221200 | -1.386866300 | -0.038766800 |
| H    | -6.088180400 | 0.623574600  | -0.091752900 |
| C    | -3.828134300 | -1.783756700 | -0.014428200 |

|   |              |              |              |
|---|--------------|--------------|--------------|
| H | -6.072478000 | -2.062611000 | -0.033529600 |
| C | 3.828062800  | 1.783853100  | 0.018926200  |
| C | 5.224013000  | 1.387157500  | 0.052705800  |
| N | 3.026742400  | 0.666596400  | 0.029960000  |
| C | 5.228994500  | 0.034635000  | 0.083921400  |
| H | 6.072192200  | 2.063018600  | 0.052428100  |
| C | 3.824472500  | -0.364857800 | 0.067749900  |
| H | 6.087827700  | -0.623108300 | 0.114545900  |
| C | -3.468138700 | -3.109495400 | 0.017764700  |
| H | -4.335219200 | -3.770403700 | 0.020682000  |
| C | 3.409549000  | -1.769513300 | 0.091079000  |
| C | 4.371752100  | -2.867171700 | 0.129999600  |
| N | 2.179070800  | -2.202681600 | 0.079744600  |
| C | 3.632443100  | -4.000242400 | 0.140871200  |
| H | 5.450427600  | -2.781242800 | 0.146271400  |
| C | 2.244772000  | -3.575651100 | 0.109427200  |
| H | 3.977543600  | -5.028065000 | 0.167500000  |
| C | -2.252940600 | -3.846315100 | 0.048355300  |
| C | -2.272817700 | -5.286834100 | 0.075599800  |
| N | -0.998176700 | -3.378577600 | 0.057430200  |
| C | -0.964688000 | -5.672804900 | 0.101441000  |
| H | -3.159519800 | -5.911832700 | 0.075002900  |
| C | -0.198620600 | -4.452504000 | 0.089296100  |
| H | -0.559706300 | -6.678906500 | 0.126308600  |
| C | 1.221929900  | -4.493436500 | 0.111730400  |
| H | 1.590861900  | -5.519025500 | 0.137755500  |

Table S19: Optimised geometry of the **hex1** macrocycle with the BHLYP/def2-SVP model chemistry.

| Atom | X            | Y           | Z            |
|------|--------------|-------------|--------------|
| C    | 4.107530200  | 1.688351700 | -1.018853800 |
| C    | 4.915292400  | 2.788593100 | -1.551439700 |
| C    | 4.126657900  | 3.875158100 | -1.516496300 |
| C    | 2.847099300  | 3.425472900 | -0.962861300 |
| N    | 2.876349200  | 2.109975300 | -0.698345100 |
| H    | 5.942784200  | 2.705754400 | -1.886705000 |
| H    | 4.356630300  | 4.891140500 | -1.816329500 |
| C    | 1.880309600  | 4.409180200 | -0.723400900 |
| H    | 2.278938300  | 5.394450900 | -0.958354800 |
| C    | 0.575869900  | 4.521632900 | -0.220840500 |
| C    | 0.092303400  | 5.873034200 | 0.067707900  |
| N    | -0.363932400 | 3.607000500 | 0.056497400  |
| C    | -1.150178300 | 5.722479000 | 0.557216100  |
| H    | 0.659095400  | 6.785682400 | -0.076637400 |
| C    | -1.428706100 | 4.285826200 | 0.508931100  |
| H    | -1.842972200 | 6.484285100 | 0.895842300  |
| C    | -2.729149300 | 3.884785100 | 0.843590700  |
| C    | 4.750648800  | 0.453746600 | -0.852947300 |
| H    | -3.309617900 | 4.739060200 | 1.186572600  |
| H    | 5.803147500  | 0.539125100 | -1.117071900 |
| C    | -3.540981900 | 2.745503200 | 0.770595100  |
| C    | -4.969587200 | 2.937554600 | 1.028148900  |
| N    | -3.284670100 | 1.475929000 | 0.419984000  |
| C    | -5.553036400 | 1.755963900 | 0.764841800  |

|   |              |              |              |
|---|--------------|--------------|--------------|
| H | -5.431277300 | 3.868523100  | 1.336586800  |
| C | -4.465916300 | 0.843586100  | 0.404725900  |
| H | -6.602460300 | 1.489943700  | 0.819300000  |
| C | 4.467704000  | -0.841521300 | -0.401342500 |
| C | 5.610457100  | -1.735130300 | -0.197550900 |
| N | 3.315773200  | -1.463189300 | -0.107845200 |
| C | 5.097840200  | -2.889971600 | 0.258489800  |
| H | 6.648294700  | -1.474098100 | -0.370100400 |
| C | 3.644388200  | -2.705003400 | 0.275272800  |
| H | 5.616838800  | -3.800398500 | 0.535580200  |
| C | 2.871244100  | -3.829815500 | 0.594376600  |
| C | -4.821600400 | -0.481140400 | 0.110755800  |
| H | 3.514468600  | -4.660479600 | 0.878252400  |
| H | -5.904550000 | -0.576597900 | 0.056129200  |
| C | 1.533192200  | -4.243559100 | 0.556653200  |
| C | 1.280078300  | -5.670482900 | 0.774069300  |
| N | 0.394997900  | -3.593921700 | 0.272732000  |
| C | -0.033304900 | -5.848588900 | 0.556275700  |
| H | 2.032271100  | -6.408708400 | 1.027554600  |
| C | -0.575236700 | -4.519593100 | 0.261907700  |
| H | -0.610993100 | -6.764710500 | 0.601272600  |
| C | -4.214586100 | -1.728548100 | -0.074927000 |
| C | -5.100854600 | -2.861579300 | -0.353652800 |
| N | -2.940832000 | -2.135267600 | 0.041609400  |
| C | -4.313035000 | -3.948840500 | -0.376158800 |
| H | -6.173520000 | -2.797030900 | -0.495836600 |
| C | -2.954483200 | -3.466524600 | -0.112976600 |

|   |              |              |              |
|---|--------------|--------------|--------------|
| H | -4.588795200 | -4.984040000 | -0.541603100 |
| C | -1.952543000 | -4.437817700 | 0.018975400  |
| H | -2.383385200 | -5.435179100 | -0.048170100 |



## La-Complexes

Table S20: Optimised geometry of the **La<sup>(III)</sup>-pent0** complex with the BHLYP/def2-SVP model chemistry.

| Atom | X          | Y          | Z          |
|------|------------|------------|------------|
| C    | 2.7895121  | 0.9768285  | -0.3741031 |
| C    | 3.7741183  | 0.4914150  | 0.5351746  |
| C    | 3.7055933  | -0.8857922 | 0.5043897  |
| C    | 2.6789169  | -1.2296923 | -0.4235426 |
| N    | 2.2432047  | -0.0896085 | -1.0243041 |
| H    | 4.3847957  | 1.0915131  | 1.1960819  |
| H    | 4.2521900  | -1.5725320 | 1.1363636  |
| C    | 2.0007662  | 2.1697578  | -0.3460290 |
| C    | 1.9929364  | 3.2698698  | 0.5707310  |
| N    | 0.7847969  | 2.0953006  | -0.9356985 |
| C    | 0.7083836  | 3.7603788  | 0.5914528  |
| H    | 2.8187168  | 3.5935320  | 1.1896677  |
| C    | -0.0567637 | 2.9557105  | -0.3121840 |
| H    | 0.3264372  | 4.5451012  | 1.2303166  |
| C    | 1.7806427  | -2.3447753 | -0.4456965 |
| C    | 1.6534516  | -3.4486466 | 0.4486085  |
| N    | 0.5795051  | -2.1395997 | -1.0500607 |
| C    | 0.3226622  | -3.8079979 | 0.4544010  |
| H    | 2.4350739  | -3.8583680 | 1.0738692  |
| C    | -0.3503689 | -2.9201327 | -0.4361546 |
| H    | -0.1412555 | -4.5542163 | 1.0850762  |
| C    | -1.6874388 | -2.4079646 | -0.4029816 |

|    |            |            |            |
|----|------------|------------|------------|
| C  | -2.7473050 | -2.6376043 | 0.5263289  |
| N  | -1.8854748 | -1.1996991 | -0.9892912 |
| C  | -3.5007043 | -1.4846642 | 0.5672000  |
| H  | -2.8746780 | -3.5139850 | 1.1471805  |
| C  | -2.8948893 | -0.5610379 | -0.3368767 |
| H  | -4.3338379 | -1.2813789 | 1.2262645  |
| C  | -1.4363489 | 2.5824611  | -0.2994781 |
| C  | -2.4887194 | 2.8933756  | 0.6210276  |
| N  | -1.7400484 | 1.4149706  | -0.9153815 |
| C  | -3.3511268 | 1.8222493  | 0.6157848  |
| H  | -2.5445428 | 3.7647687  | 1.2592689  |
| C  | -2.8179529 | 0.8664969  | -0.3082581 |
| H  | -4.2178624 | 1.6867809  | 1.2483769  |
| La | -0.0366244 | 0.0698343  | -2.1595110 |
| O  | -0.9005676 | 1.5048640  | -4.2689791 |
| H  | -1.2569718 | 2.3843354  | -4.1486044 |
| H  | -1.6486365 | 0.9203631  | -4.4444108 |
| O  | 0.3610807  | -2.1213458 | -3.9006176 |
| H  | 0.6058909  | -2.5792188 | -3.0832553 |
| H  | 1.1846940  | -1.8483954 | -4.3103915 |
| O  | 2.2195332  | 0.0622496  | -3.7941558 |
| H  | 2.6692817  | 0.0357227  | -2.9311921 |
| H  | 2.6151800  | 0.7736441  | -4.2951361 |
| O  | -2.1454897 | -0.8676980 | -3.8769628 |
| H  | -1.6032107 | -1.5938647 | -4.2000623 |
| H  | -2.5354254 | -1.1840282 | -3.0522469 |

Table S21: Optimised geometry of the **La<sup>(III)</sup>-porph1212** complex with the BHLYP/def2-SVP model chemistry.

| Atom | X            | Y            | Z            |
|------|--------------|--------------|--------------|
| C    | 3.095065800  | 1.481647300  | -0.041843200 |
| C    | 4.344952200  | 1.194812300  | -0.664071000 |
| C    | 4.271073600  | -0.105332000 | -1.073146400 |
| C    | 2.998812000  | -0.592597600 | -0.656028000 |
| N    | 2.293335700  | 0.423715900  | -0.042919100 |
| H    | 5.164291900  | 1.890709400  | -0.783779900 |
| H    | 5.025115900  | -0.687924800 | -1.586414200 |
| C    | 0.467449000  | 3.386120800  | -0.196832100 |
| C    | -0.149877300 | 4.427231000  | -0.949743300 |
| N    | -0.262549300 | 2.276596600  | -0.207794300 |
| C    | -1.295696500 | 3.889835400  | -1.465038600 |
| H    | 0.247446300  | 5.422903500  | -1.093964400 |
| C    | -1.371524400 | 2.551272200  | -0.983243700 |
| H    | -2.025856900 | 4.365943200  | -2.106931000 |
| C    | 1.565216500  | -2.670958800 | -0.272968700 |
| C    | 1.521751800  | -4.085870500 | -0.357982300 |
| N    | 0.443294200  | -2.206514800 | 0.376572300  |
| C    | 0.373222200  | -4.481680200 | 0.275770300  |
| H    | 2.274076100  | -4.708316900 | -0.824836200 |
| C    | -0.276794200 | -3.289234900 | 0.686002200  |
| H    | -0.002590400 | -5.486356400 | 0.415175500  |
| C    | -2.842374900 | 0.465946300  | -0.771391300 |
| C    | -4.108511600 | -0.101142000 | -1.087643300 |
| N    | -2.154551800 | -0.377138500 | 0.080053000  |

|   |              |              |              |
|---|--------------|--------------|--------------|
| C | -4.191947000 | -1.280005700 | -0.401183000 |
| H | -4.846667000 | 0.343451000  | -1.742780800 |
| C | -2.955213900 | -1.421421200 | 0.290237700  |
| H | -5.005542500 | -1.992765500 | -0.389282400 |
| C | 2.649014000  | -1.928660600 | -0.743084600 |
| H | 3.396910500  | -2.537473000 | -1.243459000 |
| C | -2.694914900 | -2.586245900 | 1.129646000  |
| C | -1.593446200 | -3.339537300 | 1.303876800  |
| H | -3.598699500 | -2.978342800 | 1.595016000  |
| H | -1.739954500 | -4.236118300 | 1.903340300  |
| C | 1.741771400  | 3.579280400  | 0.488392800  |
| C | 2.823945100  | 2.790131800  | 0.547484000  |
| H | 1.860479500  | 4.576414400  | 0.910051100  |
| H | 3.701167700  | 3.229269900  | 1.019597200  |
| C | -2.462846200 | 1.726939400  | -1.224461000 |
| H | -3.203338400 | 2.182117400  | -1.876782700 |
| O | -1.876136900 | -0.575550400 | 3.290730500  |
| H | -1.187799500 | -0.798416600 | 3.939897600  |
| H | -2.271566200 | -1.407779900 | 3.001517400  |
| O | -1.972754800 | 1.834847900  | 2.199103900  |
| H | -2.399967900 | 1.133737700  | 2.717173200  |
| H | -2.543276800 | 2.062284600  | 1.458258300  |
| N | 1.793937700  | -0.620528800 | 3.859026800  |
| O | 0.621311500  | -1.041755000 | 3.644002000  |
| O | 2.294140500  | 0.044442900  | 2.934815900  |
| O | 2.358534500  | -0.845683700 | 4.879216800  |
| O | 0.433550900  | 2.064543700  | 3.162141100  |

|    |              |             |             |
|----|--------------|-------------|-------------|
| H  | 1.273359600  | 2.496035400 | 3.342241500 |
| H  | -0.283087500 | 2.706432700 | 3.093061100 |
| La | 0.107339300  | 0.189511200 | 1.370934500 |

Table S22: Optimised geometry of the **La<sup>(III)</sup>-porph1122** complex with the BHLYP/def2-SVP model chemistry.

| Atom | X            | Y            | Z            |
|------|--------------|--------------|--------------|
| C    | 3.170705000  | 1.616858500  | -0.240227400 |
| C    | 4.573407300  | 1.455636600  | -0.228146700 |
| C    | 4.815863300  | 0.101633000  | -0.095513200 |
| C    | 3.555331700  | -0.531158900 | -0.030167200 |
| N    | 2.581455400  | 0.404519800  | -0.118974600 |
| H    | 5.303094200  | 2.251405000  | -0.303011500 |
| H    | 5.776671700  | -0.393966500 | -0.045235800 |
| C    | -0.056531800 | 3.418546300  | -0.344001700 |
| C    | -0.906623900 | 4.593197600  | -0.258199300 |
| N    | -0.792567400 | 2.327067700  | -0.289669900 |
| C    | -2.176955300 | 4.150258800  | -0.125049700 |
| H    | -0.556276500 | 5.616304000  | -0.279584200 |
| C    | -2.116237700 | 2.708294600  | -0.121297200 |
| H    | -3.080032800 | 4.736221900  | -0.014503600 |
| C    | 1.152731900  | -3.320302100 | 0.316547100  |
| C    | 0.754273900  | -4.671588400 | 0.663616700  |
| N    | 0.085054200  | -2.559592800 | 0.172038500  |
| C    | -0.596089200 | -4.673686200 | 0.746494500  |
| H    | 1.434060900  | -5.494693800 | 0.837848800  |
| C    | -1.032966800 | -3.329381300 | 0.460046800  |
| H    | -1.247350300 | -5.499079400 | 1.002859100  |
| C    | -3.371270700 | 0.485957200  | 0.232139600  |
| C    | -4.634033500 | -0.132532400 | 0.422781900  |
| N    | -2.391708100 | -0.448621700 | 0.242188400  |

|    |              |              |              |
|----|--------------|--------------|--------------|
| C  | -4.390850000 | -1.480847600 | 0.553065200  |
| H  | -5.588068700 | 0.376417500  | 0.465923400  |
| C  | -2.986778100 | -1.648581400 | 0.437144400  |
| H  | -5.110894700 | -2.271142300 | 0.720337800  |
| C  | 2.578492900  | -3.021811500 | 0.168980400  |
| C  | 3.457775300  | -1.975993500 | 0.071318700  |
| H  | 3.118102700  | -3.963366400 | 0.224098200  |
| H  | 4.474410700  | -2.362884500 | 0.055763200  |
| C  | -2.337854900 | -2.918622900 | 0.546937600  |
| H  | -3.030786200 | -3.724084200 | 0.774353300  |
| C  | 1.389149800  | 3.607486500  | -0.477251300 |
| C  | 2.577802100  | 2.932069100  | -0.406011600 |
| H  | 1.568348300  | 4.669890100  | -0.618050300 |
| H  | 3.398722000  | 3.636025200  | -0.525030000 |
| C  | -3.203176200 | 1.899846400  | 0.084243300  |
| H  | -4.138641700 | 2.444928900  | 0.175658900  |
| O  | 0.865900800  | 1.210524600  | -2.530568400 |
| H  | 1.291983700  | 2.066301400  | -2.400209800 |
| H  | 1.543623100  | 0.550840800  | -2.735576900 |
| O  | 1.364183300  | -1.373016000 | -2.258114000 |
| H  | 0.620846000  | -1.874552500 | -2.611494700 |
| H  | 2.028633300  | -1.999461400 | -1.941437600 |
| N  | 0.726671800  | 0.352424400  | 2.831627900  |
| O  | 0.741745700  | -0.777952200 | 2.285125600  |
| O  | 0.372471600  | 1.298698400  | 2.086361200  |
| O  | 1.022196200  | 0.513954100  | 3.969806000  |
| La | 0.143232300  | -0.031702500 | -0.125733900 |

|   |              |              |              |
|---|--------------|--------------|--------------|
| O | -1.211648500 | -0.412347200 | -2.449873800 |
| H | -0.890002200 | 0.379655200  | -2.906019700 |
| H | -2.160952800 | -0.340412800 | -2.310608500 |



Table S23: Optimised geometry of the **La<sup>(III)</sup>-sapphyrin** complex with the BHLYP/def2-SVP model chemistry.

| Atom | X            | Y            | Z            |
|------|--------------|--------------|--------------|
| C    | 0.209092500  | -2.305185300 | 2.946877900  |
| C    | 0.232588500  | -3.716812800 | 3.175505400  |
| C    | 0.220386100  | -4.320179700 | 1.946867200  |
| C    | 0.199524000  | -3.264662600 | 0.991072900  |
| N    | 0.182866400  | -2.063193400 | 1.607573500  |
| H    | 0.257553200  | -4.193595200 | 4.147042700  |
| H    | 0.236343800  | -5.379109100 | 1.727170400  |
| C    | 0.239452900  | -1.335041800 | 3.949139300  |
| H    | 0.313715000  | -1.723003700 | 4.960439500  |
| C    | 0.189658400  | 0.051271200  | 3.865190400  |
| C    | 0.259728800  | 0.880085800  | 5.032151800  |
| N    | 0.031273000  | 0.837926000  | 2.745681900  |
| C    | 0.136625700  | 2.165061300  | 4.613430500  |
| H    | 0.383694400  | 0.515159800  | 6.043598700  |
| C    | -0.008911400 | 2.124179200  | 3.185712100  |
| H    | 0.139504900  | 3.067728500  | 5.210215100  |
| C    | -0.214300700 | 3.303962600  | 2.446450000  |
| H    | -0.260292600 | 4.193198800  | 3.066598900  |
| C    | -0.343257700 | 3.566614100  | 1.090686000  |
| C    | -0.501300700 | 4.921778300  | 0.604251700  |
| N    | -0.298971100 | 2.705125900  | 0.032816400  |
| C    | -0.516209000 | 4.857263700  | -0.742712200 |
| H    | -0.572128000 | 5.798474800  | 1.234943200  |
| C    | -0.367802900 | 3.461335400  | -1.099793400 |

|    |              |              |              |
|----|--------------|--------------|--------------|
| H  | -0.604282300 | 5.669295800  | -1.452789100 |
| C  | -0.264736400 | 3.067386700  | -2.424879100 |
| H  | -0.349224400 | 3.889288700  | -3.128312100 |
| C  | -0.060213800 | 1.823210500  | -3.051119000 |
| C  | 0.006065100  | 1.744570900  | -4.488615200 |
| N  | 0.085760600  | 0.595686800  | -2.503336600 |
| C  | 0.183680000  | 0.439607500  | -4.797701500 |
| H  | -0.083761000 | 2.588504300  | -5.159950600 |
| C  | 0.222839000  | -0.281720900 | -3.553987600 |
| H  | 0.270540700  | -0.012831900 | -5.777101300 |
| C  | 0.239041300  | -3.340428200 | -0.427599000 |
| C  | 0.225525400  | -4.474801600 | -1.284184800 |
| N  | 0.314173300  | -2.202167300 | -1.156126900 |
| C  | 0.286427200  | -3.985971200 | -2.565866000 |
| H  | 0.171572400  | -5.509330900 | -0.973141500 |
| C  | 0.327101900  | -2.562658700 | -2.467142700 |
| H  | 0.289436300  | -4.552208300 | -3.488454000 |
| C  | 0.330905300  | -1.665419500 | -3.539709800 |
| H  | 0.387181900  | -2.123626000 | -4.522316500 |
| O  | -2.347595600 | 0.847487200  | 1.302220100  |
| H  | -2.454707200 | 1.775802500  | 1.065286900  |
| H  | -1.860754600 | 0.843252600  | 2.145503900  |
| O  | 2.578705000  | -1.105410300 | 0.091176100  |
| H  | 2.187633100  | -1.764874800 | -0.506662100 |
| H  | 2.680831600  | -1.548642300 | 0.940265600  |
| La | 0.071590700  | 0.104577200  | 0.118255500  |
| O  | 2.264084500  | 1.472065100  | -0.159760300 |

|   |              |              |              |
|---|--------------|--------------|--------------|
| H | 3.021970100  | 0.940323200  | -0.424885300 |
| H | 2.256411600  | 2.320542500  | -0.611103800 |
| O | -2.215640700 | -0.896125800 | -0.616810400 |
| H | -2.277938700 | -1.793051900 | -0.955440300 |
| H | -2.896868100 | -0.719047100 | 0.041656100  |

Table S24: Optimised geometry of the **La<sup>(III)</sup>-porph2** complex with the BHLYP/def2-SVP model chemistry.

| Atom | X            | Y            | Z            |
|------|--------------|--------------|--------------|
| C    | 2.959633100  | 1.477989000  | -0.430734400 |
| C    | 4.327618200  | 1.618628200  | 0.038040700  |
| C    | 4.481290700  | 0.758469900  | 1.060602500  |
| C    | 3.250397900  | -0.004489800 | 1.126693400  |
| N    | 2.321712600  | 0.509831200  | 0.283377800  |
| H    | 5.051331200  | 2.307403400  | -0.377565300 |
| H    | 5.361635300  | 0.567588100  | 1.659451500  |
| C    | 0.017134600  | 2.763809900  | -1.632036000 |
| C    | -0.810168200 | 3.793862200  | -2.200603500 |
| N    | -0.606908800 | 2.226881700  | -0.528956800 |
| C    | -1.867015000 | 3.949272900  | -1.365083900 |
| H    | -0.567901900 | 4.364814000  | -3.087543200 |
| C    | -1.734681000 | 2.927653400  | -0.367522200 |
| H    | -2.688793300 | 4.648988900  | -1.437260800 |
| C    | 1.641310800  | -2.863429600 | 0.658609400  |
| C    | 1.705913700  | -4.206301400 | 0.168567000  |
| N    | 0.615215900  | -2.183528800 | 0.043244000  |
| C    | 0.786784200  | -4.294025700 | -0.824654300 |
| H    | 2.412817700  | -4.955524700 | 0.499846300  |
| C    | 0.081266500  | -3.042816800 | -0.843944100 |
| H    | 0.565346700  | -5.140766500 | -1.460397200 |
| C    | -3.472414100 | 0.340284300  | 0.402925400  |
| C    | -4.676310200 | -0.370330000 | 0.192859100  |
| N    | -2.426705500 | -0.291188100 | -0.184539700 |

|   |              |              |              |
|---|--------------|--------------|--------------|
| C | -4.354079800 | -1.416085800 | -0.639864500 |
| H | -5.654693200 | -0.077545900 | 0.550675200  |
| C | -2.949883300 | -1.364761400 | -0.834112400 |
| H | -5.019996500 | -2.152106900 | -1.071945000 |
| C | 2.619077800  | -2.427089800 | 1.553374900  |
| C | 3.254433400  | -1.219747200 | 1.814211000  |
| H | 3.090417100  | -3.260910900 | 2.067533700  |
| H | 4.071127200  | -1.301855800 | 2.524421700  |
| C | -2.300263600 | -2.358548900 | -1.626351300 |
| C | -1.086545000 | -2.976010300 | -1.668900900 |
| H | -3.007976600 | -2.803494700 | -2.323459300 |
| H | -1.055055600 | -3.765160400 | -2.415366100 |
| C | 1.336397900  | 2.680199400  | -2.057295900 |
| C | 2.545804500  | 2.256930200  | -1.506678700 |
| H | 1.488774800  | 3.259467100  | -2.964355300 |
| H | 3.395897100  | 2.709126400  | -2.010937700 |
| C | -3.474646500 | 1.654912800  | 0.969616300  |
| C | -2.759146900 | 2.752873900  | 0.630865700  |
| H | -4.304067900 | 1.833611500  | 1.648935700  |
| H | -3.131700500 | 3.692816600  | 1.033750800  |
| N | 1.040186500  | -0.708885400 | 3.945383500  |
| O | 0.391337700  | -1.519292400 | 3.256384300  |
| O | 1.081275300  | 0.461720100  | 3.497291800  |
| O | -1.805478900 | 0.448627800  | 3.155297400  |
| H | -2.115467400 | -0.464563300 | 3.255692700  |
| H | -1.401552500 | 0.747235200  | 3.974979100  |
| O | 1.580704400  | -1.017352600 | 4.961089400  |

|    |              |              |             |
|----|--------------|--------------|-------------|
| La | -0.186092400 | 0.107162700  | 1.115322700 |
| O  | -1.869959300 | -1.969017900 | 2.046115000 |
| H  | -1.285203700 | -2.672160300 | 2.348597100 |
| H  | -2.456044900 | -2.308883300 | 1.359399300 |
| O  | 0.409502400  | 2.484667100  | 2.096371600 |
| H  | 1.086965700  | 2.417686300  | 2.779202000 |
| H  | 0.639660000  | 3.166043500  | 1.458998500 |

Table S25: Optimised geometry of the **La<sup>(III)</sup>-amethyrin** complex with the BHLYP/def2-SVP model chemistry.

| Atom | X            | Y            | Z           |
|------|--------------|--------------|-------------|
| C    | 2.785253200  | -2.806056100 | 0.127950000 |
| C    | 2.893641400  | -4.253627700 | 0.155254300 |
| C    | 1.630987300  | -4.731268900 | 0.199806000 |
| C    | 0.779340100  | -3.565202500 | 0.188637500 |
| N    | 1.488473100  | -2.427247600 | 0.141265700 |
| H    | 3.821088600  | -4.809697700 | 0.148272200 |
| H    | 1.302422900  | -5.759972100 | 0.233456600 |
| C    | 3.915716600  | -0.584563800 | 0.157409300 |
| C    | 5.124771300  | 0.209071200  | 0.102189000 |
| N    | 2.831082400  | 0.219712800  | 0.260587300 |
| C    | 4.739119400  | 1.505869100  | 0.164434100 |
| H    | 6.127741500  | -0.186088500 | 0.016045200 |
| C    | 3.301691300  | 1.478306700  | 0.256152900 |
| H    | 5.358991100  | 2.390472200  | 0.136779100 |
| C    | 2.409271900  | 2.560013400  | 0.298435600 |
| C    | 2.663718600  | 3.976303800  | 0.303751500 |
| N    | 1.090979100  | 2.320458600  | 0.291488900 |
| C    | 1.441993200  | 4.577341600  | 0.287453500 |
| H    | 3.634266600  | 4.451405600  | 0.310548100 |
| C    | 0.477706400  | 3.509768600  | 0.265386400 |
| H    | 1.225906800  | 5.635998300  | 0.276320500 |
| C    | -0.920964800 | 3.548949100  | 0.170769100 |
| C    | -1.773832400 | 4.708081900  | 0.128991400 |
| N    | -1.627632100 | 2.407882700  | 0.090595200 |

|    |              |              |              |
|----|--------------|--------------|--------------|
| C  | -3.033901800 | 4.227542100  | 0.021036600  |
| H  | -1.449710800 | 5.737637200  | 0.175745900  |
| H  | -3.959610400 | 4.783313800  | -0.037937400 |
| C  | -0.620826900 | -3.528642600 | 0.204954400  |
| C  | -1.581634100 | -4.603771300 | 0.204583100  |
| N  | -1.245501900 | -2.346821200 | 0.178052100  |
| C  | -2.806154700 | -4.013463200 | 0.157805800  |
| H  | -1.357737800 | -5.660618400 | 0.225706800  |
| H  | -3.772970800 | -4.495395900 | 0.134262100  |
| C  | -2.559059000 | -2.594306300 | 0.132966400  |
| C  | -2.926400500 | 2.784332600  | 0.000155100  |
| C  | -5.252963600 | -0.228007300 | -0.089047700 |
| C  | -4.878096500 | -1.526790500 | -0.016551400 |
| C  | -4.036916900 | 0.555663700  | -0.066326100 |
| H  | -6.253812200 | 0.177360300  | -0.146225200 |
| C  | -3.441045900 | -1.510130600 | 0.043957400  |
| N  | -2.956229800 | -0.254461300 | 0.005628100  |
| H  | -5.505033200 | -2.406635500 | -0.003923900 |
| La | -0.187791200 | 0.023773000  | -0.189083000 |
| N  | 0.042712600  | 0.002719200  | -3.170699700 |
| O  | 0.424531100  | 0.971005400  | -2.460957100 |
| O  | 0.126781700  | 0.008617000  | -4.351094800 |
| O  | -0.434576200 | -0.967730300 | -2.529254200 |
| O  | 0.776053300  | -0.064163800 | 2.244128400  |
| H  | 1.674864600  | -0.098243200 | 1.875311600  |
| H  | 0.754727600  | 0.711337600  | 2.803885900  |
| C  | 3.897265500  | -1.971359200 | 0.111388300  |



|   |              |              |              |
|---|--------------|--------------|--------------|
| C | -4.026860400 | 1.944730700  | -0.084099700 |
| H | 4.862743500  | -2.462717000 | 0.062647800  |
| H | -4.994579000 | 2.429314500  | -0.148995100 |

Table S26: Optimised geometry of the **La<sup>(III)</sup>-isoamethyrin** complex with the BHLYP/def2-SVP model chemistry.

| Atom | X            | Y            | Z           |
|------|--------------|--------------|-------------|
| C    | 3.304849800  | 1.683759400  | 0.379944900 |
| C    | 4.734555300  | 1.737546900  | 0.287878000 |
| C    | 5.151586700  | 0.444346800  | 0.344477000 |
| C    | 3.963216100  | -0.361167900 | 0.465668400 |
| N    | 2.863799800  | 0.419174800  | 0.498926400 |
| H    | 5.335622000  | 2.628950800  | 0.178617200 |
| H    | 6.163864400  | 0.067465700  | 0.292451300 |
| C    | 2.362804800  | 2.729111600  | 0.348680000 |
| C    | 2.542498200  | 4.165308000  | 0.329546500 |
| N    | 1.070323800  | 2.417975900  | 0.369645300 |
| C    | 1.293947400  | 4.700300100  | 0.356886100 |
| H    | 3.486826700  | 4.690373300  | 0.307721800 |
| C    | 0.384260900  | 3.580323500  | 0.386864400 |
| H    | 1.021293300  | 5.746140400  | 0.359536000 |
| C    | -1.001625300 | 3.482490900  | 0.435040200 |
| C    | -2.064070700 | 4.459749000  | 0.416489300 |
| N    | -1.516850400 | 2.236924600  | 0.467168800 |
| C    | -3.223295300 | 3.751377700  | 0.416726900 |
| H    | -1.944505200 | 5.533596300  | 0.391788800 |
| C    | -2.838254800 | 2.356323200  | 0.434882400 |
| H    | -4.233086400 | 4.135552500  | 0.392284200 |
| C    | -3.607610400 | 1.181212600  | 0.372067800 |
| C    | -5.033016800 | 1.037480200  | 0.318493400 |
| N    | -2.982568700 | -0.008546700 | 0.325819600 |

|    |              |              |              |
|----|--------------|--------------|--------------|
| C  | -5.258993300 | -0.298578900 | 0.234412800  |
| H  | -5.756539300 | 1.839762100  | 0.338995800  |
| H  | -6.207696300 | -0.814040100 | 0.174370400  |
| C  | 2.865122100  | -2.609589000 | 0.517725100  |
| C  | 3.037909700  | -4.043416200 | 0.551622200  |
| N  | 1.537075000  | -2.295251800 | 0.456493800  |
| C  | 1.800424700  | -4.583188400 | 0.502684300  |
| H  | 3.990500600  | -4.552590100 | 0.600384100  |
| H  | 1.526288200  | -5.627316100 | 0.502290800  |
| C  | 0.895694400  | -3.462931000 | 0.438353000  |
| C  | -3.964092300 | -0.932256500 | 0.240957100  |
| C  | -2.549911000 | -4.456917200 | 0.222239600  |
| C  | -1.244835400 | -4.806874500 | 0.310923500  |
| C  | -2.591214500 | -3.017746500 | 0.216223600  |
| H  | -3.415026400 | -5.103642300 | 0.173631000  |
| C  | -0.512968800 | -3.570514400 | 0.347503500  |
| N  | -1.324720600 | -2.510065500 | 0.284984100  |
| H  | -0.821922000 | -5.799377900 | 0.347313100  |
| C  | -3.778452800 | -2.309898200 | 0.181216100  |
| H  | -4.680911200 | -2.908283000 | 0.119631300  |
| C  | 3.951512300  | -1.753116600 | 0.514455500  |
| H  | 4.923410600  | -2.234727700 | 0.523729700  |
| O  | 0.040646100  | 0.150293800  | -4.088150200 |
| O  | -0.871337300 | 0.762443300  | -2.249617900 |
| O  | 0.740404000  | -0.617099200 | -2.214760800 |
| N  | -0.028429200 | 0.102359600  | -2.907856600 |
| La | -0.173604200 | -0.049081700 | 0.072363100  |

|   |             |             |             |
|---|-------------|-------------|-------------|
| O | 0.814441000 | 0.191719500 | 2.473395800 |
| H | 1.709347500 | 0.214018500 | 2.088598300 |
| H | 0.698521400 | 1.042332000 | 2.896453000 |

Table S27: Optimised geometry of the **La<sup>(III)</sup>-pent1** complex with the BHLYP/def2-SVP model chemistry.

| Atom | X          | Y          | Z          |
|------|------------|------------|------------|
| C    | 0.0749831  | -2.1336099 | 2.9771576  |
| C    | -0.3751855 | -3.4144766 | 3.4744571  |
| C    | -0.5203765 | -4.2119264 | 2.3981327  |
| C    | -0.1377598 | -3.4222992 | 1.2492056  |
| N    | 0.1769020  | -2.1545634 | 1.6259588  |
| H    | -0.5417842 | -3.6499053 | 4.5163558  |
| H    | -0.8290492 | -5.2474078 | 2.3622126  |
| C    | 0.4386171  | -1.1167178 | 3.8506366  |
| H    | 0.3997988  | -1.4000358 | 4.8962849  |
| C    | 0.8312205  | 0.2011684  | 3.6410506  |
| C    | 1.2091385  | 1.0209488  | 4.7732509  |
| N    | 0.8284313  | 0.9295203  | 2.4977960  |
| C    | 1.3965113  | 2.2640776  | 4.2961667  |
| H    | 1.2871356  | 0.6684986  | 5.7922976  |
| C    | 1.0998261  | 2.2052510  | 2.8796954  |
| H    | 1.6575247  | 3.1636296  | 4.8360154  |
| C    | 0.9326473  | 3.3880277  | 2.1756801  |
| H    | 1.1094505  | 4.2792168  | 2.7672223  |
| C    | 0.4275410  | 3.6505002  | 0.9035494  |
| C    | -0.0178083 | 4.9738843  | 0.5452308  |
| N    | 0.2569288  | 2.7912721  | -0.1298958 |
| C    | -0.4991653 | 4.8881772  | -0.7137794 |
| H    | 0.0178217  | 5.8371240  | 1.1950923  |
| C    | -0.2814948 | 3.5293302  | -1.1403223 |

|    |            |            |            |
|----|------------|------------|------------|
| H  | -0.9312596 | 5.6684859  | -1.3247144 |
| C  | -0.4518431 | 3.1581361  | -2.4650240 |
| C  | 0.0230154  | -4.0063544 | 0.0048972  |
| H  | -0.1853302 | -5.0699192 | -0.0194562 |
| H  | -0.8568184 | 3.9374283  | -3.1006115 |
| C  | -0.0427946 | 2.0142257  | -3.1459596 |
| C  | 0.0343462  | 2.0155798  | -4.5849073 |
| N  | 0.4316420  | 0.8480617  | -2.6378401 |
| C  | 0.6242233  | 0.8522195  | -4.9338477 |
| H  | -0.2957967 | 2.8233541  | -5.2230835 |
| C  | 0.8224277  | 0.1161245  | -3.7098727 |
| H  | 0.8683741  | 0.4895158  | -5.9225916 |
| C  | 0.4995046  | -3.4915381 | -1.2003508 |
| C  | 0.8562262  | -4.3884500 | -2.2768897 |
| N  | 0.6966998  | -2.2040479 | -1.5582792 |
| C  | 1.2946950  | -3.6122935 | -3.2862902 |
| H  | 0.7783445  | -5.4659486 | -2.2369258 |
| C  | 1.1359309  | -2.2450802 | -2.8416922 |
| H  | 1.6450141  | -3.9096332 | -4.2648733 |
| C  | 1.2453448  | -1.2107070 | -3.7589873 |
| H  | 1.5738643  | -1.5282034 | -4.7422873 |
| La | 0.3195028  | 0.0142624  | -0.0316823 |
| N  | -2.6636983 | -0.1353516 | 0.1858622  |
| O  | -2.0303645 | -0.6804378 | -0.7542327 |
| O  | -1.9554964 | 0.4982120  | 1.0092025  |
| O  | -3.8415725 | -0.2141807 | 0.2886978  |
| O  | 2.6223316  | -1.0510391 | 0.6991944  |

|   |           |            |            |
|---|-----------|------------|------------|
| H | 3.1716522 | -0.4181916 | 1.1612337  |
| O | 2.6241069 | 1.3696301  | -0.5529197 |
| H | 2.8922364 | 1.2127065  | -1.4585230 |
| H | 2.3195481 | -1.7029763 | 1.3356852  |
| H | 2.1011708 | 2.1823540  | -0.5751238 |

Table S28: Optimised geometry of the **La<sup>(III)</sup>-rosarin** complex with the BHLYP/def2-SVP model chemistry.

| Atom | X            | Y            | Z            |
|------|--------------|--------------|--------------|
| C    | 2.326861900  | 3.157475300  | -0.439859300 |
| C    | 2.614683100  | 4.432917400  | -0.986071100 |
| C    | 1.473862200  | 5.180942100  | -0.804566900 |
| C    | 0.530736000  | 4.324848100  | -0.185202300 |
| N    | 1.082313300  | 3.091751700  | 0.024868900  |
| H    | 3.542468100  | 4.740742200  | -1.447619600 |
| H    | 1.299694200  | 6.208201900  | -1.098104700 |
| C    | -0.780830700 | 4.639515100  | 0.150853500  |
| H    | -1.047890900 | 5.691553200  | 0.100583400  |
| C    | -1.815323000 | 3.779576500  | 0.462181300  |
| C    | -3.142977800 | 4.254730900  | 0.692762700  |
| N    | -1.810943700 | 2.396219100  | 0.381079900  |
| C    | -3.950836500 | 3.159720400  | 0.715947300  |
| H    | -3.422979100 | 5.295550600  | 0.793304200  |
| C    | -3.082508700 | 2.045698600  | 0.490039400  |
| H    | -5.023017200 | 3.122949100  | 0.843623300  |
| C    | -3.540437000 | 0.694526900  | 0.282642200  |
| C    | -4.900884300 | 0.341846700  | 0.104982300  |
| N    | -2.720658800 | -0.359291800 | 0.168678500  |
| C    | -4.903383500 | -1.002977900 | -0.151146600 |
| H    | -5.744413500 | 1.015641600  | 0.136221800  |
| C    | -3.553391300 | -1.426556400 | -0.094249400 |
| H    | -5.751683200 | -1.645720000 | -0.347510600 |
| C    | 3.241589400  | 2.062544600  | -0.244666800 |



|   |              |              |              |
|---|--------------|--------------|--------------|
| C | 4.664322600  | 2.204292100  | -0.323361100 |
| N | 2.863329200  | 0.850558900  | 0.141599800  |
| C | 5.171098000  | 1.013207700  | 0.085081100  |
| H | 5.196212300  | 3.099440500  | -0.612334000 |
| C | 4.049373700  | 0.167837600  | 0.362247300  |
| H | 6.208818200  | 0.720910800  | 0.181898200  |
| C | 4.208441200  | -1.133200600 | 0.759837400  |
| C | -3.193990200 | -2.762807400 | -0.200202500 |
| H | 5.237843000  | -1.435141000 | 0.930259400  |
| H | -4.010661900 | -3.444560400 | -0.417913900 |
| C | 3.273090500  | -2.159802800 | 0.913095000  |
| C | 3.646393500  | -3.490578900 | 1.211568700  |
| N | 1.928837400  | -2.082801900 | 0.657723700  |
| C | 2.503611700  | -4.250918000 | 1.110334600  |
| H | 4.650428100  | -3.823102100 | 1.441396600  |
| C | 1.482848100  | -3.344381000 | 0.756922500  |
| H | 2.395377700  | -5.317485500 | 1.248573300  |
| C | -1.964957900 | -3.350348600 | -0.010708700 |
| C | -1.751413800 | -4.756325100 | -0.017706100 |
| N | -0.787818500 | -2.693106900 | 0.288151800  |
| C | -0.436764400 | -4.955588400 | 0.297893700  |
| H | -2.508911200 | -5.500327600 | -0.227995900 |
| C | 0.113587300  | -3.656572700 | 0.467249000  |
| H | 0.098829100  | -5.890272200 | 0.382897200  |
| O | 0.724101800  | 1.767127400  | 2.202790000  |
| H | 1.568486100  | 1.674064100  | 2.654008000  |
| H | 0.865170400  | 2.409776400  | 1.396558100  |

|    |              |              |             |
|----|--------------|--------------|-------------|
| O  | 0.520375900  | -1.188464500 | 2.915252300 |
| H  | 0.966444500  | -2.043110800 | 2.903607900 |
| H  | -0.226666700 | -1.191424900 | 3.524459200 |
| La | -0.012513300 | -0.132102200 | 0.643460600 |
| O  | -1.482807200 | 0.455959800  | 2.772899800 |
| H  | -1.023551100 | 1.296411800  | 2.940200700 |
| H  | -2.397195300 | 0.648732300  | 2.536491500 |

Table S29: Optimised geometry of the **La<sup>(III)</sup>-rubyrin** complex with the BHLYP/def2-SVP model chemistry.

| Atom | X            | Y            | Z            |
|------|--------------|--------------|--------------|
| C    | 2.018998600  | 3.906673200  | 0.408649300  |
| C    | 2.165249800  | 5.205921200  | -0.167124700 |
| C    | 1.052649700  | 5.391060700  | -0.941130900 |
| C    | 0.252024000  | 4.220434800  | -0.771725400 |
| N    | 0.865266900  | 3.342962500  | 0.059525900  |
| H    | 3.010846600  | 5.868982000  | -0.039901700 |
| H    | 0.805000000  | 6.243523300  | -1.560407000 |
| C    | -1.005493100 | 4.036373300  | -1.345061600 |
| H    | -1.335525600 | 4.864835100  | -1.966179500 |
| C    | -1.960861200 | 3.045235600  | -1.183558700 |
| C    | -3.319872800 | 3.326642600  | -1.538850100 |
| N    | -1.888843900 | 1.863548800  | -0.472825400 |
| C    | -4.082307700 | 2.360360900  | -0.956479600 |
| H    | -3.649742500 | 4.187038000  | -2.106414200 |
| C    | -3.152384000 | 1.486108700  | -0.323076000 |
| H    | -5.157347300 | 2.249482700  | -0.974668800 |
| C    | 3.054747800  | 3.233043400  | 1.126506300  |
| H    | 3.813313400  | 3.874975500  | 1.566236600  |
| C    | -3.525949700 | 0.300457200  | 0.408714300  |
| C    | -4.818833600 | 0.047042200  | 0.999485200  |
| N    | -2.695146900 | -0.697133900 | 0.596537200  |
| C    | -4.726528700 | -1.173914200 | 1.576559700  |
| H    | -5.664808100 | 0.719157900  | 0.982281700  |
| C    | -3.405176000 | -1.671578900 | 1.277572800  |

|   |              |              |              |
|---|--------------|--------------|--------------|
| H | -5.491082700 | -1.720123500 | 2.113141900  |
| C | 3.330383700  | 1.900110200  | 1.152976400  |
| C | 4.640479200  | 1.414140500  | 1.543764700  |
| N | 2.632384200  | 0.878051700  | 0.509371900  |
| C | 4.756323900  | 0.168535800  | 1.039386900  |
| H | 5.383707700  | 1.994437400  | 2.074925100  |
| C | 3.484304700  | -0.108005400 | 0.409004700  |
| H | 5.599785400  | -0.505399500 | 1.090421400  |
| C | -3.018582200 | -2.964897400 | 1.403172300  |
| H | -3.712513900 | -3.629865900 | 1.907524600  |
| C | 3.164667100  | -1.333640200 | -0.290956100 |
| C | 4.104250600  | -2.197653100 | -0.917459600 |
| N | 1.919129600  | -1.777958200 | -0.398850700 |
| C | 3.367313400  | -3.225490700 | -1.434812100 |
| H | 5.173250800  | -2.047212200 | -0.969542700 |
| C | 2.011677300  | -2.980583100 | -1.063259400 |
| H | 3.721190700  | -4.095857200 | -1.971778500 |
| C | -1.912175700 | -3.609251200 | 0.771905700  |
| C | -1.951664200 | -5.007291500 | 0.505440200  |
| N | -0.842427700 | -3.021509900 | 0.208728100  |
| C | -0.886796300 | -5.262517300 | -0.309894000 |
| H | -2.708425700 | -5.694643900 | 0.859052100  |
| C | -0.197192200 | -4.026072300 | -0.456829900 |
| H | -0.582199500 | -6.206636400 | -0.742024500 |
| C | 1.039497300  | -3.958193600 | -1.102322700 |
| H | 1.328398700  | -4.869312300 | -1.617981600 |
| N | 0.325406200  | -1.205385200 | 3.474544100  |

|    |              |              |             |
|----|--------------|--------------|-------------|
| O  | -0.793855500 | -1.239967700 | 2.905951000 |
| O  | 1.271507900  | -0.796830100 | 2.751727900 |
| O  | 0.478416100  | -1.524690500 | 4.604108400 |
| La | -0.085087200 | -0.369542200 | 0.620410400 |
| O  | -0.013551700 | 1.734637600  | 1.973624800 |
| H  | 0.629442500  | 1.798264900  | 2.685988200 |
| H  | 0.219587200  | 2.426077700  | 1.275117400 |

Table S30: Optimised geometry of the **La<sup>(III)</sup>-hex1** complex with the BHLYP/def2-SVP model chemistry.

| Atom | X          | Y          | Z          |
|------|------------|------------|------------|
| C    | 1.7845954  | 3.2687164  | -0.1155638 |
| C    | 2.0007967  | 4.4931146  | -0.8714398 |
| C    | 1.3057361  | 4.3626002  | -2.0141122 |
| C    | 0.5398319  | 3.1283440  | -1.8737147 |
| N    | 0.9033241  | 2.4575246  | -0.7748436 |
| H    | 2.6403423  | 5.3082258  | -0.5614253 |
| H    | 1.2253673  | 5.0570738  | -2.8389345 |
| C    | -0.6160857 | 2.9274910  | -2.6439727 |
| H    | -0.7207521 | 3.5651440  | -3.5143620 |
| C    | -1.8107500 | 2.4458735  | -2.0973261 |
| C    | -3.0797513 | 3.0595767  | -2.4795190 |
| N    | -1.9518608 | 1.6939877  | -0.9946592 |
| C    | -3.9226081 | 2.8155575  | -1.4636972 |
| H    | -3.2371605 | 3.6712679  | -3.3570539 |
| C    | -3.2188683 | 1.9333510  | -0.5431038 |
| H    | -4.9377221 | 3.1641483  | -1.3314423 |
| C    | -3.8039332 | 1.4577500  | 0.6037714  |
| C    | 2.4584469  | 2.9990869  | 1.0481298  |
| H    | -4.7358816 | 1.9264283  | 0.8985635  |
| H    | 2.9764892  | 3.8312901  | 1.5107233  |
| C    | -3.4446169 | 0.3012012  | 1.3249207  |
| C    | -4.2386522 | -0.2120890 | 2.4289152  |
| N    | -2.5454756 | -0.5907771 | 0.9205137  |
| C    | -3.8414550 | -1.4856769 | 2.6142813  |

|   |            |            |            |
|---|------------|------------|------------|
| H | -5.0181464 | 0.3328963  | 2.9429957  |
| C | -2.8317431 | -1.7424058 | 1.6031771  |
| H | -4.2259927 | -2.2176229 | 3.3110022  |
| C | 2.7667342  | 1.7217792  | 1.5619073  |
| C | 3.7452328  | 1.5299205  | 2.6176647  |
| N | 2.4668155  | 0.5721037  | 0.9637562  |
| C | 4.1036578  | 0.2321639  | 2.5612155  |
| H | 4.1285177  | 2.3085602  | 3.2623624  |
| C | 3.3416852  | -0.3486402 | 1.4728025  |
| H | 4.8467312  | -0.2885313 | 3.1493042  |
| C | 3.7029128  | -1.5062404 | 0.8378434  |
| C | -2.5286050 | -2.9980655 | 1.1534221  |
| H | 4.5699070  | -2.0242510 | 1.2339173  |
| H | -2.9965332 | -3.8281287 | 1.6715296  |
| C | 3.1717377  | -2.0290016 | -0.3639779 |
| C | 3.9206473  | -2.8876222 | -1.2369623 |
| N | 1.9283646  | -1.8290210 | -0.8268431 |
| C | 3.0942138  | -3.1884497 | -2.2729754 |
| H | 4.9412761  | -3.2078054 | -1.0790942 |
| C | 1.8262080  | -2.5921733 | -1.9488211 |
| H | 3.2899524  | -3.8296060 | -3.1217097 |
| C | -1.8493908 | -3.3161851 | -0.0485391 |
| C | -2.1467224 | -4.4955828 | -0.8151632 |
| N | -0.9167553 | -2.5674471 | -0.6486640 |
| C | -1.3946946 | -4.4103244 | -1.9423699 |
| H | -2.8537481 | -5.2647228 | -0.5367001 |
| C | -0.5668592 | -3.2447530 | -1.7763846 |

|    |            |            |            |
|----|------------|------------|------------|
| H  | -1.3366629 | -5.1110568 | -2.7640418 |
| C  | 0.6406811  | -3.1321414 | -2.4560608 |
| H  | 0.7500612  | -3.7662599 | -3.3300573 |
| La | -0.0339780 | -0.0337641 | -0.0168300 |
| N  | -0.0904146 | 0.1463490  | 2.9829531  |
| O  | -0.1218912 | 0.2159755  | 4.1689312  |
| O  | -0.3181563 | 1.1384984  | 2.2488697  |
| O  | 0.1710846  | -0.9242741 | 2.3828492  |
| O  | 0.1354304  | -0.0283358 | -2.6459498 |
| H  | 0.8460021  | -0.5014221 | -3.0788639 |
| H  | 0.0164929  | 0.8170801  | -3.0895694 |



## Gd-Complexes

Table S31: Optimised geometry of the **Gd<sup>(III)</sup>-pent0** complex with the BHLYP/def2-SVP model chemistry.

| Atom | X          | Y          | Z          |
|------|------------|------------|------------|
| C    | -2.7449727 | -0.9817903 | -0.5396616 |
| C    | -3.7991232 | -0.5160146 | 0.2981516  |
| C    | -3.7358402 | 0.8640150  | 0.2942648  |
| C    | -2.6447485 | 1.2281902  | -0.5470133 |
| N    | -2.1522449 | 0.0978326  | -1.1180527 |
| H    | -4.4616909 | -1.1285202 | 0.8945084  |
| H    | -4.3394298 | 1.5372335  | 0.8878186  |
| C    | -1.9523368 | -2.1742348 | -0.5295228 |
| C    | -1.9716554 | -3.3419418 | 0.2944502  |
| N    | -0.7125666 | -2.0443397 | -1.0569521 |
| C    | -0.6835319 | -3.8307385 | 0.3228924  |
| H    | -2.8185771 | -3.7209066 | 0.8502432  |
| C    | 0.1085624  | -2.9572397 | -0.4843920 |
| H    | -0.3233689 | -4.6678713 | 0.9053894  |
| C    | -1.7449737 | 2.3417060  | -0.5328599 |
| C    | -1.6470961 | 3.4928439  | 0.3065621  |
| N    | -0.5237307 | 2.1012519  | -1.0695213 |
| C    | -0.3161742 | 3.8532741  | 0.3381131  |
| H    | -2.4509242 | 3.9430629  | 0.8730540  |
| C    | 0.3860112  | 2.9185778  | -0.4816180 |
| H    | 0.1246211  | 4.6408960  | 0.9340568  |
| C    | 1.7210279  | 2.4061328  | -0.4409838 |

|    |            |            |            |
|----|------------|------------|------------|
| C  | 2.8351310  | 2.6640088  | 0.4185670  |
| N  | 1.8796965  | 1.1780124  | -0.9848070 |
| C  | 3.5918209  | 1.5133761  | 0.4468456  |
| H  | 3.0062852  | 3.5636115  | 0.9939916  |
| C  | 2.9329867  | 0.5639290  | -0.3959363 |
| H  | 4.4724164  | 1.3343405  | 1.0487233  |
| C  | 1.4893320  | -2.5865953 | -0.4407924 |
| C  | 2.5546091  | -2.9327283 | 0.4458439  |
| N  | 1.7813048  | -1.3901825 | -1.0080245 |
| C  | 3.4179259  | -1.8575345 | 0.4746170  |
| H  | 2.6235224  | -3.8306601 | 1.0448053  |
| C  | 2.8725625  | -0.8640822 | -0.3945298 |
| H  | 4.2936710  | -1.7506770 | 1.1003041  |
| Gd | 0.0933646  | -0.0101307 | -1.9892129 |
| O  | 0.0553778  | 1.5970678  | -3.9736139 |
| H  | -0.7300809 | 1.2802114  | -4.4272870 |
| O  | -1.7630961 | -0.4873899 | -3.8119188 |
| H  | -1.8687072 | -1.3979777 | -4.0866071 |
| O  | 1.5296823  | -0.9651558 | -3.8246065 |
| H  | 2.0264450  | -0.3382166 | -4.3499724 |
| H  | -0.1989903 | 2.4029502  | -3.5166967 |
| H  | 2.1499337  | -1.3888356 | -3.2204774 |
| H  | -2.3657533 | -0.3588352 | -3.0620717 |

Table S32: Optimised geometry of the **Gd<sup>(III)</sup>-porph1212** complex with the BHLYP/def2-SVP model chemistry.

| Atom | X            | Y            | Z            |
|------|--------------|--------------|--------------|
| C    | 3.004051700  | 1.439355900  | 0.199659800  |
| C    | 4.297281800  | 1.126404200  | -0.310278900 |
| C    | 4.236051900  | -0.170854500 | -0.728255400 |
| C    | 2.925031400  | -0.635326400 | -0.424863200 |
| N    | 2.184815600  | 0.393443700  | 0.131016800  |
| H    | 5.135067000  | 1.808764200  | -0.355969300 |
| H    | 5.020254300  | -0.767383600 | -1.176000400 |
| C    | 0.421229700  | 3.333122500  | -0.199785800 |
| C    | -0.138401700 | 4.361963400  | -1.004888300 |
| N    | -0.318483000 | 2.222041600  | -0.242466900 |
| C    | -1.256871700 | 3.827117200  | -1.583739200 |
| H    | 0.274897800  | 5.353166400  | -1.133442500 |
| C    | -1.377082500 | 2.502432200  | -1.086911800 |
| H    | -1.945997900 | 4.301450700  | -2.270541300 |
| C    | 1.426109100  | -2.680151400 | -0.170575000 |
| C    | 1.377985500  | -4.092824700 | -0.249280600 |
| N    | 0.272684600  | -2.197718800 | 0.407949000  |
| C    | 0.194026400  | -4.475481200 | 0.324866000  |
| H    | 2.153114100  | -4.722719000 | -0.665845700 |
| C    | -0.469806400 | -3.278766600 | 0.690972200  |
| H    | -0.195045800 | -5.476361600 | 0.455084300  |
| C    | -2.905040600 | 0.478844300  | -0.843955300 |
| C    | -4.199498500 | -0.036431400 | -1.120930700 |
| N    | -2.238663900 | -0.361735900 | 0.027728500  |

|    |              |              |              |
|----|--------------|--------------|--------------|
| C  | -4.331245500 | -1.176799800 | -0.380846200 |
| H  | -4.925692200 | 0.421663200  | -1.779812500 |
| C  | -3.090613200 | -1.355754900 | 0.291054500  |
| H  | -5.179105300 | -1.845807500 | -0.322741100 |
| C  | 2.558127600  | -1.959642600 | -0.554561600 |
| H  | 3.329533600  | -2.581128300 | -1.000190700 |
| C  | -2.877476000 | -2.536555000 | 1.114071200  |
| C  | -1.802580700 | -3.330878600 | 1.267652700  |
| H  | -3.797263100 | -2.907172600 | 1.562013900  |
| H  | -1.982028000 | -4.247807500 | 1.825898800  |
| C  | 1.640703400  | 3.548456300  | 0.568569900  |
| C  | 2.708172700  | 2.761785400  | 0.736625300  |
| H  | 1.722323400  | 4.553822100  | 0.976739200  |
| H  | 3.546587100  | 3.204181700  | 1.270158800  |
| C  | -2.485401300 | 1.706068700  | -1.337884600 |
| H  | -3.197171600 | 2.160855200  | -2.021073900 |
| O  | -1.046820000 | -0.991541500 | 3.095341300  |
| H  | -0.288459100 | -1.478297500 | 3.446868400  |
| H  | -1.744165100 | -1.628173500 | 2.886198300  |
| O  | -1.627949600 | 1.716759100  | 2.314422300  |
| H  | -1.128938500 | 1.933697700  | 3.113121500  |
| H  | -1.729380800 | 2.528432400  | 1.806275500  |
| N  | 1.680198300  | 0.427165900  | 3.493145400  |
| O  | 1.564373900  | -0.687987300 | 2.939584600  |
| O  | 0.948347500  | 1.339574100  | 3.017527300  |
| O  | 2.416964200  | 0.624605400  | 4.400209000  |
| Gd | -0.051843300 | 0.152065600  | 1.135764200  |

Table S33: Optimised geometry of the **Gd<sup>(III)</sup>-porph1122** complex with the BHLYP/def2-SVP model chemistry.

| Atom | X            | Y            | Z            |
|------|--------------|--------------|--------------|
| C    | 2.863206000  | 1.627905400  | 0.093572200  |
| C    | 3.990895200  | 1.698694500  | -0.759035700 |
| C    | 4.186926900  | 0.426233700  | -1.222191500 |
| C    | 3.185616300  | -0.393264500 | -0.635032900 |
| N    | 2.351364000  | 0.397566700  | 0.144320000  |
| H    | 4.577319300  | 2.585631100  | -0.956111200 |
| H    | 4.976715900  | 0.069566700  | -1.870772700 |
| C    | 0.173173700  | 3.315633200  | 0.138570300  |
| C    | -0.517995500 | 4.376705600  | -0.505873200 |
| N    | -0.464088400 | 2.153509200  | 0.001315900  |
| C    | -1.630240300 | 3.813619700  | -1.070129500 |
| H    | -0.199466900 | 5.409861000  | -0.535855700 |
| C    | -1.605924300 | 2.432653400  | -0.731161900 |
| H    | -2.406255300 | 4.300741900  | -1.646572900 |
| C    | 1.453174500  | -3.159777500 | 0.403980300  |
| C    | 1.121598700  | -4.535330200 | 0.779040500  |
| N    | 0.363365000  | -2.377110600 | 0.495872600  |
| C    | -0.192073700 | -4.568687900 | 1.032727800  |
| H    | 1.833130000  | -5.349871200 | 0.797582700  |
| C    | -0.693633600 | -3.223696400 | 0.788122100  |
| H    | -0.807945300 | -5.416468100 | 1.302974600  |
| C    | -2.882470300 | 0.253992000  | -0.603960000 |
| C    | -4.103627400 | -0.437521700 | -0.838379200 |
| N    | -1.993307200 | -0.569599100 | 0.043608100  |

|    |              |              |              |
|----|--------------|--------------|--------------|
| C  | -3.950612700 | -1.689849600 | -0.312360700 |
| H  | -4.969786500 | -0.024993400 | -1.339463400 |
| C  | -2.620980200 | -1.743355100 | 0.196701200  |
| H  | -4.659360700 | -2.507092000 | -0.309218400 |
| C  | 2.719676800  | -2.897602900 | -0.124695900 |
| C  | 3.327220000  | -1.780298500 | -0.676308100 |
| H  | 3.315818100  | -3.799327900 | -0.223205700 |
| H  | 4.220294000  | -2.048111900 | -1.237022800 |
| C  | -2.023026900 | -2.941565200 | 0.703755900  |
| H  | -2.703702900 | -3.765855800 | 0.890306000  |
| C  | 1.378235200  | 3.505738500  | 0.941014900  |
| C  | 2.482337100  | 2.765421700  | 0.950168100  |
| H  | 1.362343400  | 4.381274500  | 1.588040000  |
| H  | 3.276800000  | 3.082368100  | 1.624995000  |
| C  | -2.666941900 | 1.574585000  | -0.976976900 |
| H  | -3.490107200 | 2.026178700  | -1.523324900 |
| O  | -1.601324700 | 1.433435600  | 2.568850800  |
| H  | -0.929749600 | 1.750050600  | 3.192291600  |
| H  | -1.879541900 | 2.174320500  | 2.020721600  |
| O  | -1.177389300 | -1.079861400 | 2.998166300  |
| H  | -1.469577100 | -1.983402400 | 2.828808700  |
| H  | -1.951997600 | -0.506011700 | 3.060419900  |
| Gd | 0.153721900  | -0.020810700 | 1.173050200  |
| N  | 1.619757900  | 0.078571800  | 3.654439500  |
| O  | 1.683053800  | -0.912955700 | 2.910004500  |
| O  | 0.934969700  | 1.047504100  | 3.199350900  |
| O  | 2.151367500  | 0.140683200  | 4.711808200  |

Table S34: Optimised geometry of the **Gd<sup>(III)</sup>-sapphyrin** complex with the BHLYP/def2-SVP model chemistry.

| Atom | X            | Y            | Z            |
|------|--------------|--------------|--------------|
| C    | -0.024831800 | -2.459238700 | 2.899606900  |
| C    | 0.045114500  | -3.874327900 | 3.071360600  |
| C    | 0.299225900  | -4.409936700 | 1.840026000  |
| C    | 0.359664000  | -3.308302100 | 0.944096700  |
| N    | 0.174685200  | -2.139260600 | 1.590295400  |
| H    | -0.079735400 | -4.395121300 | 4.011752200  |
| H    | 0.413697700  | -5.452175600 | 1.576356700  |
| C    | -0.234024700 | -1.544285000 | 3.919014800  |
| H    | -0.383844100 | -1.955521100 | 4.911667800  |
| C    | -0.203763200 | -0.163438000 | 3.835993500  |
| C    | -0.244486500 | 0.650433800  | 5.013059600  |
| N    | -0.017381500 | 0.616537200  | 2.718340500  |
| C    | -0.029304700 | 1.926141800  | 4.612074900  |
| H    | -0.392417500 | 0.275324200  | 6.017276300  |
| C    | 0.098365600  | 1.887347700  | 3.183405300  |
| H    | 0.024762300  | 2.823693700  | 5.213829500  |
| C    | 0.299461400  | 3.066043200  | 2.457429900  |
| H    | 0.418370800  | 3.947779100  | 3.077855300  |
| C    | 0.242899300  | 3.333618600  | 1.102854500  |
| C    | 0.251292600  | 4.702475900  | 0.649640300  |
| N    | 0.062235300  | 2.476865300  | 0.048972100  |
| C    | 0.010651000  | 4.671630200  | -0.674444000 |
| H    | 0.386170500  | 5.561971100  | 1.292949800  |
| C    | -0.097766400 | 3.282505500  | -1.050673600 |

|    |              |              |              |
|----|--------------|--------------|--------------|
| H  | -0.084185300 | 5.500604100  | -1.363317800 |
| C  | -0.331481200 | 2.967268600  | -2.377930700 |
| H  | -0.482877900 | 3.830429600  | -3.017098700 |
| C  | -0.341655000 | 1.748292400  | -3.055790000 |
| C  | -0.525962100 | 1.664524100  | -4.473259900 |
| N  | -0.103505100 | 0.515245300  | -2.527680200 |
| C  | -0.358102900 | 0.359345700  | -4.811138800 |
| H  | -0.735132800 | 2.504572900  | -5.122408800 |
| C  | -0.089392800 | -0.351656500 | -3.600703200 |
| H  | -0.407870300 | -0.090037600 | -5.794530300 |
| C  | 0.490326800  | -3.321686000 | -0.457919700 |
| C  | 0.638829800  | -4.444712900 | -1.316888500 |
| N  | 0.383128400  | -2.171276600 | -1.155209300 |
| C  | 0.592129500  | -3.946771400 | -2.586664800 |
| H  | 0.744048500  | -5.474729900 | -1.005730800 |
| C  | 0.409874400  | -2.533067300 | -2.474094500 |
| H  | 0.647064900  | -4.493052100 | -3.519399900 |
| C  | 0.185242200  | -1.708024500 | -3.570431600 |
| H  | 0.197387300  | -2.202617500 | -4.536258800 |
| O  | 2.292202800  | 0.115720400  | -1.300130400 |
| H  | 2.563574700  | -0.773846000 | -1.555787400 |
| H  | 1.637429900  | 0.394908800  | -1.983216200 |
| O  | 2.435502300  | 0.679742000  | 1.252256200  |
| H  | 2.977788100  | 1.091536000  | 0.569640800  |
| H  | 2.334854700  | 1.277393900  | 2.002830500  |
| Gd | 0.326887000  | -0.074770000 | 0.285642200  |
| O  | -1.965659000 | 0.211016800  | -0.426539000 |



|   |              |             |              |
|---|--------------|-------------|--------------|
| H | -2.340850600 | 1.057583800 | -0.157596300 |
| H | -1.724155100 | 0.291160600 | -1.372708800 |

Table S35: Optimised geometry of the **Gd<sup>(III)</sup>-porph2** complex with the BHLYP/def2-SVP model chemistry.

| Atom | X            | Y            | Z            |
|------|--------------|--------------|--------------|
| C    | 2.390589170  | 0.646157650  | -0.695891750 |
| C    | 3.927858600  | 0.597725100  | -0.680128850 |
| C    | 4.300855620  | 0.067126810  | 0.468984950  |
| C    | 3.022446370  | -0.395845390 | 1.142962510  |
| N    | 1.937313340  | 0.082923730  | 0.467076120  |
| H    | 4.577539430  | 0.944967540  | -1.455962550 |
| H    | 5.300497670  | -0.038912990 | 0.835583010  |
| C    | -0.203059070 | 2.413232050  | -0.892117520 |
| C    | -0.809915860 | 3.823672070  | -1.019896600 |
| N    | -0.725997110 | 1.837274850  | 0.240018150  |
| C    | -1.648871100 | 3.991957060  | -0.014204990 |
| H    | -0.587409410 | 4.541150610  | -1.782635330 |
| C    | -1.714022570 | 2.650837010  | 0.691255990  |
| H    | -2.191259040 | 4.880555310  | 0.233293630  |
| C    | 1.609197690  | -2.822084480 | 1.165447040  |
| C    | 1.785942640  | -4.187872880 | 0.523666680  |
| N    | 0.644768370  | -2.135697850 | 0.497196730  |
| C    | 1.075809320  | -4.162431810 | -0.594002400 |
| H    | 2.380923140  | -4.999252450 | 0.890080050  |
| C    | 0.321264050  | -2.820863900 | -0.644231700 |
| H    | 1.027342010  | -4.940002490 | -1.326612050 |
| C    | -3.271856300 | 0.336157960  | 0.422816050  |
| C    | -4.399556860 | -0.084550170 | -0.506284250 |
| N    | -2.122220730 | -0.305649450 | 0.054726700  |

|   |              |              |              |
|---|--------------|--------------|--------------|
| C | -3.842347650 | -0.813607240 | -1.458413350 |
| H | -5.434677520 | 0.173306390  | -0.418931650 |
| C | -2.358690730 | -1.001728440 | -1.101296880 |
| H | -4.338262230 | -1.212635950 | -2.318287980 |
| C | 2.401446890  | -2.424394750 | 2.263320720  |
| C | 3.080535240  | -1.240398790 | 2.261105090  |
| H | 2.535111710  | -3.097453030 | 3.083611320  |
| H | 3.722749370  | -0.999695270 | 3.082628390  |
| C | -1.613937110 | -1.828892790 | -1.960169530 |
| C | -0.507759020 | -2.601724910 | -1.761590910 |
| H | -2.014966810 | -1.898419840 | -2.949407990 |
| H | -0.235554890 | -3.182956460 | -2.617035180 |
| C | 0.714503410  | 2.035762250  | -1.879210930 |
| C | 1.813195030  | 1.259159350  | -1.805517720 |
| H | 0.539808070  | 2.468711810  | -2.841936910 |
| H | 2.349464580  | 1.141898530  | -2.723815010 |
| C | -3.501529130 | 1.272461240  | 1.457700450  |
| C | -2.726508160 | 2.383215920  | 1.614821110  |
| H | -4.352466740 | 1.146117740  | 2.092491650  |
| H | -2.951759000 | 3.084711810  | 2.391074380  |
| N | 1.468460320  | 0.686977870  | 3.610944180  |
| O | 0.939568110  | -0.434583680 | 3.493190830  |
| O | 1.065860300  | 1.398637630  | 2.672156830  |
| O | -2.058481540 | 0.553269970  | 2.757485050  |
| H | -1.781669770 | 0.684806840  | 3.666566700  |
| H | -2.397887550 | 1.378907630  | 2.402404870  |
| O | 2.326677830  | 1.069339810  | 4.593654200  |

|    |              |              |             |
|----|--------------|--------------|-------------|
| O  | -1.293305430 | -2.109090840 | 2.218594930 |
| H  | -0.782907110 | -2.503866110 | 2.928925370 |
| H  | -2.171275380 | -1.890356680 | 2.539376100 |
| Gd | -0.222335690 | -0.153616730 | 1.475149010 |

Table S36: Optimised geometry of the **Gd<sup>(III)</sup>-amethyryn** complex with the BHLYP/def2-SVP model chemistry.

| Atom | X            | Y            | Z           |
|------|--------------|--------------|-------------|
| C    | 2.887816400  | -2.802674400 | 0.054079900 |
| C    | 2.968203200  | -4.254439100 | 0.107009600 |
| C    | 1.711900400  | -4.694503900 | 0.327310600 |
| C    | 0.896924400  | -3.497784500 | 0.381229500 |
| N    | 1.614902200  | -2.389185900 | 0.211195200 |
| H    | 3.874727200  | -4.834903900 | 0.002945100 |
| H    | 1.365099600  | -5.711789600 | 0.437341000 |
| C    | 3.977964000  | -0.595418800 | 0.054737100 |
| C    | 5.180333600  | 0.221237300  | 0.117234600 |
| N    | 2.876408200  | 0.164082400  | 0.215670700 |
| C    | 4.767439100  | 1.484307600  | 0.351624700 |
| H    | 6.192000900  | -0.146024600 | 0.011428600 |
| C    | 3.321934000  | 1.405124300  | 0.403705900 |
| H    | 5.365492200  | 2.375794100  | 0.473533400 |
| C    | 2.411028500  | 2.447636700  | 0.579115800 |
| C    | 2.673987900  | 3.851895900  | 0.709975200 |
| N    | 1.087992100  | 2.208233600  | 0.522501200 |
| C    | 1.459993800  | 4.464996300  | 0.690638800 |
| H    | 3.649426600  | 4.310640400  | 0.782396500 |
| C    | 0.496847500  | 3.413048800  | 0.549708700 |
| H    | 1.246229000  | 5.522632000  | 0.743984200 |
| C    | -0.879578600 | 3.495910500  | 0.333993400 |
| C    | -1.694631700 | 4.673089100  | 0.239396200 |
| N    | -1.587351000 | 2.372502200  | 0.130071000 |

|    |              |              |              |
|----|--------------|--------------|--------------|
| C  | -2.942029000 | 4.225315600  | -0.039241400 |
| H  | -1.357896300 | 5.691847400  | 0.364363400  |
| H  | -3.845111600 | 4.801880100  | -0.184675300 |
| C  | -0.487917500 | -3.409419500 | 0.530170600  |
| C  | -1.445669800 | -4.473665500 | 0.621624600  |
| N  | -1.101121700 | -2.213017000 | 0.470468400  |
| C  | -2.669847600 | -3.882815900 | 0.572479400  |
| H  | -1.218400400 | -5.527741500 | 0.688169800  |
| H  | -3.640359500 | -4.357038100 | 0.591109000  |
| C  | -2.417053600 | -2.476996200 | 0.455855100  |
| C  | -2.861160600 | 2.786429400  | -0.089070700 |
| C  | -5.138765800 | -0.225632400 | -0.143927800 |
| C  | -4.741720800 | -1.495899900 | 0.107407400  |
| C  | -3.946703200 | 0.585582200  | -0.145237900 |
| H  | -6.142520600 | 0.145652500  | -0.298019000 |
| C  | -3.314003400 | -1.430972500 | 0.233743000  |
| N  | -2.847799600 | -0.181625900 | 0.070619100  |
| H  | -5.348556300 | -2.385092000 | 0.196613900  |
| N  | -0.058125200 | 0.060940400  | -2.898470900 |
| O  | 0.333694800  | 1.036143400  | -2.202183000 |
| O  | 0.012615000  | 0.040001800  | -4.074845100 |
| O  | -0.533693500 | -0.888435200 | -2.219610300 |
| C  | 3.994987000  | -1.976733000 | -0.063693800 |
| C  | -3.959848700 | 1.963816900  | -0.261736200 |
| H  | 4.960905900  | -2.453715000 | -0.186129200 |
| H  | -4.918072900 | 2.440765400  | -0.431123100 |
| Gd | -0.230914700 | 0.116018200  | -0.095486900 |

Table S37: Optimised geometry of the **Gd<sup>(III)</sup>-isoamethyrin** complex with the BHLYP/def2-SVP model chemistry.

| Atom | X            | Y            | Z            |
|------|--------------|--------------|--------------|
| C    | 3.808805300  | -0.289083000 | -0.067433400 |
| C    | 5.068803700  | -0.988193200 | -0.100849800 |
| C    | 4.765776200  | -2.276043200 | 0.188812500  |
| C    | 3.329485800  | -2.317752900 | 0.372818000  |
| N    | 2.785805900  | -1.105367900 | 0.206132100  |
| H    | 6.037309100  | -0.556284900 | -0.308839100 |
| H    | 5.435534500  | -3.121668100 | 0.265599800  |
| C    | 3.547999300  | 1.080365900  | -0.146919500 |
| C    | 4.458661500  | 2.200086200  | -0.209017800 |
| N    | 2.291650500  | 1.495822200  | 0.029402400  |
| C    | 3.702524200  | 3.308667000  | -0.005491800 |
| H    | 5.527538300  | 2.142122500  | -0.357045700 |
| C    | 2.352894600  | 2.834410100  | 0.164905300  |
| H    | 4.027776000  | 4.338139700  | 0.042612000  |
| C    | 1.168172000  | 3.467905500  | 0.505748200  |
| C    | 0.812643900  | 4.841715700  | 0.720925400  |
| N    | 0.084453200  | 2.671030700  | 0.617629500  |
| C    | -0.532150600 | 4.847960800  | 0.932649000  |
| H    | 1.485316600  | 5.687181800  | 0.695648700  |
| C    | -0.953143100 | 3.475399400  | 0.834376100  |
| H    | -1.171804000 | 5.700261700  | 1.111608400  |
| C    | -2.233712300 | 2.908153100  | 0.768566400  |
| C    | -3.512373000 | 3.556437900  | 0.797307400  |
| N    | -2.330307800 | 1.602377900  | 0.488382900  |

|    |              |              |              |
|----|--------------|--------------|--------------|
| C  | -4.409022800 | 2.588784900  | 0.480963800  |
| H  | -3.694791700 | 4.600827600  | 1.005742700  |
| H  | -5.482384800 | 2.674898600  | 0.381823800  |
| C  | 1.224293200  | -3.577087500 | 0.694912300  |
| C  | 0.596029400  | -4.874771400 | 0.783623900  |
| N  | 0.285559100  | -2.602456800 | 0.488533900  |
| C  | -0.720990300 | -4.679940200 | 0.562660600  |
| H  | 1.119611700  | -5.805046400 | 0.955449300  |
| H  | -1.511623300 | -5.413880900 | 0.525339000  |
| C  | -0.867138000 | -3.258777700 | 0.380213500  |
| C  | -3.648561400 | 1.379907400  | 0.288857200  |
| C  | -4.241654000 | -2.286435200 | -0.304423200 |
| C  | -3.333314100 | -3.275325000 | -0.126479500 |
| C  | -3.532904800 | -1.047411100 | -0.147536700 |
| H  | -5.302881500 | -2.373705100 | -0.491680500 |
| C  | -2.085618900 | -2.610508100 | 0.103609200  |
| N  | -2.200566800 | -1.277465800 | 0.061921600  |
| H  | -3.492503600 | -4.342677600 | -0.148855600 |
| C  | -4.199034900 | 0.160692000  | -0.063303100 |
| H  | -5.269781700 | 0.133922500  | -0.230901700 |
| Gd | 0.020937000  | 0.184222500  | 0.004664200  |
| C  | 2.598744000  | -3.462758100 | 0.665902400  |
| H  | 3.158572300  | -4.379348300 | 0.815366500  |
| O  | -0.003662200 | 0.294361500  | -3.969687100 |
| O  | -0.525587800 | 1.148801400  | -2.072339200 |
| O  | 0.521445000  | -0.683774500 | -2.134465400 |
| N  | -0.002340000 | 0.254145500  | -2.791641400 |



Table S38: Optimised geometry of the **Gd<sup>(III)</sup>-pent1** complex with the BHLYP/def2-SVP model chemistry.

| Atom | X          | Y          | Z          |
|------|------------|------------|------------|
| C    | -0.4693038 | -2.0626368 | 2.8662386  |
| C    | -1.1207639 | -3.2664937 | 3.3325225  |
| C    | -1.6070908 | -3.8839821 | 2.2401891  |
| C    | -1.1807840 | -3.0908736 | 1.1068593  |
| N    | -0.5718300 | -1.9415563 | 1.5240139  |
| H    | -1.1727995 | -3.5796577 | 4.3659365  |
| H    | -2.1344234 | -4.8255003 | 2.1735524  |
| C    | 0.2234564  | -1.2379238 | 3.7453935  |
| H    | 0.3493174  | -1.6276094 | 4.7485644  |
| C    | 0.7089703  | 0.0379966  | 3.5334525  |
| C    | 1.3534078  | 0.7864401  | 4.5926200  |
| N    | 0.4976764  | 0.8225157  | 2.4481335  |
| C    | 1.4653510  | 2.0510698  | 4.1493365  |
| H    | 1.6386362  | 0.3773856  | 5.5517854  |
| C    | 0.8733410  | 2.0726768  | 2.8278242  |
| H    | 1.8609466  | 2.9162987  | 4.6627378  |
| C    | 0.5409503  | 3.2590807  | 2.2102605  |
| H    | 0.7954008  | 4.1617740  | 2.7529104  |
| C    | -0.2081343 | 3.4449162  | 1.0491444  |
| C    | -0.8108862 | 4.7224456  | 0.7468868  |
| N    | -0.4606274 | 2.5430348  | 0.0791956  |
| C    | -1.4491020 | 4.5704548  | -0.4296574 |
| H    | -0.7433499 | 5.6022710  | 1.3714005  |
| C    | -1.1483826 | 3.2292694  | -0.8789078 |

|    |            |            |            |
|----|------------|------------|------------|
| H  | -2.0070659 | 5.3032321  | -0.9959277 |
| C  | -1.2733066 | 2.9110235  | -2.2153803 |
| C  | -1.1470717 | -3.6535828 | -0.1535718 |
| H  | -1.5918789 | -4.6390743 | -0.2329332 |
| H  | -1.7694865 | 3.6557033  | -2.8274595 |
| C  | -0.6007134 | 1.9087484  | -2.9198085 |
| C  | -0.2804742 | 2.0590430  | -4.3128023 |
| N  | -0.0383492 | 0.7908596  | -2.4102684 |
| C  | 0.5667027  | 1.0461119  | -4.6167353 |
| H  | -0.6227613 | 2.8638193  | -4.9484390 |
| C  | 0.6547597  | 0.2304571  | -3.4375584 |
| H  | 1.0455997  | 0.8299460  | -5.5616927 |
| C  | -0.4039598 | -3.2421069 | -1.2651135 |
| C  | 0.0029471  | -4.1690599 | -2.2890519 |
| N  | 0.0891963  | -2.0112755 | -1.5019377 |
| C  | 0.8108342  | -3.4770349 | -3.1259559 |
| H  | -0.2716464 | -5.2140111 | -2.3294151 |
| C  | 0.7906672  | -2.1147064 | -2.6617977 |
| H  | 1.3198291  | -3.8269569 | -4.0133454 |
| C  | 1.1596065  | -1.0639603 | -3.4882803 |
| H  | 1.7026331  | -1.3292007 | -4.3881641 |
| Gd | 0.2132774  | 0.0514002  | 0.0595411  |
| N  | 3.0555063  | 0.0374021  | 0.1630482  |
| O  | 4.2350006  | 0.0551338  | 0.2578029  |
| O  | 2.3932782  | 1.0209863  | -0.2596604 |
| O  | 2.3627105  | -0.9631735 | 0.4768386  |
| O  | -2.1787731 | -0.2603953 | -0.5355849 |

|   |            |            |            |
|---|------------|------------|------------|
| H | -2.1293663 | -0.2441926 | -1.4952416 |
| H | -2.4853052 | -1.1376594 | -0.2986857 |

Table S39: Optimised geometry of the **Gd<sup>(III)</sup>-rosarin** complex with the BHLYP/def2-SVP model chemistry.

| Atom | X            | Y            | Z            |
|------|--------------|--------------|--------------|
| C    | 1.978787300  | 2.693912000  | -0.828247600 |
| C    | 2.281742600  | 4.075252500  | -0.957724100 |
| C    | 1.303629000  | 4.729280100  | -0.251461300 |
| C    | 0.416537400  | 3.729998000  | 0.231548100  |
| N    | 0.845481700  | 2.486497200  | -0.161449600 |
| H    | 3.143426200  | 4.500214100  | -1.453521900 |
| H    | 1.200102900  | 5.794760000  | -0.089119200 |
| C    | -0.732431600 | 3.968079800  | 0.975976900  |
| H    | -0.889741300 | 4.986220600  | 1.320474600  |
| C    | -1.767693500 | 3.071338500  | 1.174295500  |
| C    | -3.104810000 | 3.481840500  | 1.466121100  |
| N    | -1.778555900 | 1.808560600  | 0.610624700  |
| C    | -3.926093700 | 2.503101100  | 0.978577300  |
| H    | -3.387674400 | 4.428916400  | 1.908142300  |
| C    | -3.057042700 | 1.510123800  | 0.443765400  |
| H    | -5.006938100 | 2.477801600  | 0.970932100  |
| C    | -3.398406500 | 0.324993200  | -0.294500000 |
| C    | -4.643121900 | -0.037297900 | -0.861641800 |
| N    | -2.454322800 | -0.589322200 | -0.509355200 |
| C    | -4.435784400 | -1.266439600 | -1.442086900 |
| H    | -5.556571700 | 0.540266600  | -0.827715100 |
| C    | -3.087917500 | -1.618351900 | -1.164406400 |
| H    | -5.159744200 | -1.895401100 | -1.944371300 |
| C    | 2.892753200  | 1.588782800  | -0.978436400 |

|   |              |              |              |
|---|--------------|--------------|--------------|
| C | 4.246897400  | 1.650988900  | -1.404680100 |
| N | 2.616806800  | 0.462719100  | -0.324834800 |
| C | 4.842465900  | 0.534483000  | -0.882752000 |
| H | 4.706983600  | 2.457603200  | -1.958528800 |
| C | 3.829539700  | -0.178709600 | -0.182395000 |
| H | 5.885547000  | 0.249142300  | -0.935596100 |
| C | 4.069260700  | -1.169644200 | 0.750479000  |
| C | -2.638106800 | -2.933855400 | -1.119458600 |
| H | 5.106939100  | -1.447166600 | 0.911456200  |
| H | -3.266747200 | -3.686156500 | -1.586574500 |
| C | 3.115582200  | -1.874215300 | 1.473453400  |
| C | 3.395634600  | -3.018133700 | 2.267095400  |
| N | 1.772355500  | -1.824599300 | 1.177619900  |
| C | 2.216686400  | -3.712528300 | 2.385238600  |
| H | 4.373756700  | -3.301944200 | 2.634645600  |
| C | 1.265786800  | -2.963631700 | 1.649995100  |
| H | 2.048056100  | -4.664959200 | 2.868479600  |
| C | -1.590356000 | -3.391191000 | -0.345715800 |
| C | -1.445445000 | -4.743196000 | 0.078186200  |
| N | -0.657409100 | -2.597675500 | 0.288068100  |
| C | -0.447614300 | -4.756015000 | 1.014587500  |
| H | -2.050307000 | -5.573767400 | -0.262790900 |
| C | 0.025439300  | -3.417268800 | 1.078647000  |
| H | -0.054599500 | -5.600596700 | 1.563015400  |
| O | -0.242404900 | 0.455127700  | -2.129146300 |
| H | -0.010014200 | 1.387891000  | -2.238507300 |
| H | -1.197401500 | 0.359008700  | -2.256718100 |

|    |              |              |             |
|----|--------------|--------------|-------------|
| O  | 0.106684500  | 0.571631600  | 2.492587000 |
| H  | 0.874938600  | 0.477080100  | 3.065390800 |
| H  | -0.315587500 | 1.429687100  | 2.638082000 |
| Gd | 0.108134500  | -0.102636800 | 0.195112700 |

Table S40: Optimised geometry of the **Gd<sup>(III)</sup>-rubiyrin** complex with the BHLYP/def2-SVP model chemistry.

| Atom | X            | Y            | Z            |
|------|--------------|--------------|--------------|
| C    | 1.884177200  | 3.333880600  | 0.656735000  |
| C    | 2.020402100  | 4.691520500  | 0.236801800  |
| C    | 1.212141200  | 4.826984200  | -0.855339000 |
| C    | 0.544702000  | 3.574518400  | -1.002569300 |
| N    | 0.981669500  | 2.670880200  | -0.084029200 |
| H    | 2.673464800  | 5.429130500  | 0.684420800  |
| H    | 1.046893200  | 5.706759700  | -1.463545900 |
| C    | -0.581618900 | 3.441390800  | -1.823608900 |
| H    | -0.743393500 | 4.244744500  | -2.536460600 |
| C    | -1.630466400 | 2.560808500  | -1.646069600 |
| C    | -2.975142500 | 2.887839300  | -2.007972700 |
| N    | -1.633155800 | 1.563767700  | -0.702203000 |
| C    | -3.787035000 | 2.156363700  | -1.182809500 |
| H    | -3.265934200 | 3.638322600  | -2.731627800 |
| C    | -2.908090600 | 1.363750200  | -0.397123700 |
| H    | -4.866435000 | 2.169402200  | -1.122760700 |
| C    | 2.821346500  | 2.766888400  | 1.572364000  |
| H    | 3.409461700  | 3.472556900  | 2.150973100  |
| C    | -3.203168700 | 0.408164600  | 0.642900800  |
| C    | -4.395924400 | 0.201779600  | 1.420394200  |
| N    | -2.266330300 | -0.457206400 | 0.937185400  |
| C    | -4.132787100 | -0.871968900 | 2.212452200  |
| H    | -5.303760800 | 0.786376800  | 1.366463400  |
| C    | -2.818337100 | -1.340182100 | 1.837900100  |

|   |              |              |              |
|---|--------------|--------------|--------------|
| H | -4.795729900 | -1.357026100 | 2.917023100  |
| C | 3.232095600  | 1.468907200  | 1.549477400  |
| C | 4.570066200  | 1.021130600  | 1.860257200  |
| N | 2.621897700  | 0.535614200  | 0.741759400  |
| C | 4.781023000  | -0.097617200 | 1.116320700  |
| H | 5.278464000  | 1.545584100  | 2.488199200  |
| C | 3.538542300  | -0.347127300 | 0.435422500  |
| H | 5.684379400  | -0.685958500 | 1.034940300  |
| C | -2.404031300 | -2.635260700 | 1.909067100  |
| H | -2.949618900 | -3.304675300 | 2.566967700  |
| C | 3.175550600  | -1.361476900 | -0.524295300 |
| C | 4.000776300  | -2.200870200 | -1.319581000 |
| N | 1.883284400  | -1.576501800 | -0.729971000 |
| C | 3.136261000  | -2.978096700 | -2.043214500 |
| H | 5.081792400  | -2.212644100 | -1.332107500 |
| C | 1.818569100  | -2.627474300 | -1.610978500 |
| H | 3.378799700  | -3.770596800 | -2.739325200 |
| C | -1.529939600 | -3.256745000 | 0.966747600  |
| C | -1.691279800 | -4.636584200 | 0.637934900  |
| N | -0.681416700 | -2.640212300 | 0.128389200  |
| C | -0.958820100 | -4.837725700 | -0.496728500 |
| H | -2.310825900 | -5.345271600 | 1.171634200  |
| C | -0.305850600 | -3.597294600 | -0.762756500 |
| H | -0.833148200 | -5.752217500 | -1.061644400 |
| C | 0.761886000  | -3.514964300 | -1.664738600 |
| H | 0.876615500  | -4.359212500 | -2.338347800 |
| N | 0.256958200  | 0.105019000  | 3.156456600  |



|    |             |              |             |
|----|-------------|--------------|-------------|
| O  | 0.435934400 | -0.952617700 | 2.499270300 |
| O  | 0.030588600 | 1.123422400  | 2.453453400 |
| O  | 0.298183300 | 0.139168900  | 4.337949800 |
| Gd | 0.160962800 | 0.024447400  | 0.344619800 |

Table S41: Optimised geometry of the **Gd<sup>(III)</sup>-hex1** complex with the BHLYP/def2-SVP model chemistry.

| Atom | X          | Y          | Z          |
|------|------------|------------|------------|
| C    | 2.8741883  | 0.9133617  | -2.1757505 |
| C    | 3.2664625  | 1.7634244  | -3.2872607 |
| C    | 2.4768872  | 2.8549022  | -3.2179151 |
| C    | 1.6152261  | 2.6540984  | -2.0649830 |
| N    | 1.7969093  | 1.4235585  | -1.5495372 |
| H    | 4.0831120  | 1.5670943  | -3.9681171 |
| H    | 2.5069474  | 3.7458738  | -3.8297151 |
| C    | 1.0134730  | 3.6761657  | -1.3421131 |
| H    | 1.1081266  | 4.6845842  | -1.7283543 |
| C    | 0.5365062  | 3.5388612  | -0.0312276 |
| C    | 0.5295996  | 4.6212801  | 0.9184453  |
| N    | 0.0851048  | 2.3978858  | 0.5431430  |
| C    | 0.1155334  | 4.0955611  | 2.0968925  |
| H    | 0.8313080  | 5.6380652  | 0.7079435  |
| C    | -0.2578515 | 2.7302228  | 1.8099126  |
| H    | -0.0199806 | 4.5967294  | 3.0453920  |
| C    | -1.2108333 | 2.0737113  | 2.5889237  |
| C    | 3.6956124  | -0.0340945 | -1.5783545 |
| H    | -1.3835467 | 2.4698439  | 3.5831950  |
| H    | 4.6574933  | -0.2243866 | -2.0405649 |
| C    | -2.2263129 | 1.2885867  | 2.0426558  |
| C    | -3.5804180 | 1.3882204  | 2.5353943  |
| N    | -2.2065795 | 0.7228434  | 0.8128734  |
| C    | -4.3781502 | 1.0302333  | 1.5001084  |

|   |            |            |            |
|---|------------|------------|------------|
| H | -3.8688208 | 1.7748494  | 3.5031547  |
| C | -3.5035787 | 0.5859735  | 0.4459497  |
| H | -5.4584373 | 1.0362163  | 1.4538365  |
| C | 3.4932385  | -0.5551164 | -0.2928658 |
| C | 4.5729677  | -0.9797101 | 0.5600926  |
| N | 2.3045464  | -0.6792107 | 0.3452314  |
| C | 4.0148548  | -1.3123173 | 1.7493048  |
| H | 5.6185276  | -0.9904221 | 0.2846352  |
| C | 2.5867821  | -1.2183158 | 1.5545902  |
| H | 4.5033686  | -1.6790272 | 2.6415257  |
| C | 1.7117494  | -1.9873423 | 2.3219384  |
| C | -3.9732142 | 0.0367643  | -0.7552175 |
| H | 2.0925087  | -2.3621901 | 3.2652300  |
| H | -5.0124065 | 0.2173105  | -1.0053927 |
| C | 0.6156013  | -2.6575518 | 1.7784494  |
| C | 0.3135583  | -4.0147740 | 2.1696259  |
| N | 0.0110773  | -2.3531547 | 0.6061169  |
| C | -0.3400212 | -4.5660546 | 1.1183039  |
| H | 0.6477998  | -4.4945129 | 3.0792049  |
| C | -0.5499852 | -3.5056145 | 0.1670131  |
| H | -0.6779065 | -5.5863721 | 1.0000669  |
| C | -3.2947444 | -0.9246323 | -1.4931734 |
| C | -3.9134236 | -1.7998914 | -2.4747031 |
| N | -2.1067696 | -1.4221921 | -1.1004232 |
| C | -3.1245480 | -2.8913889 | -2.5498462 |
| H | -4.8574892 | -1.6177534 | -2.9692412 |
| C | -2.0368844 | -2.6653765 | -1.6126601 |

|    |            |            |            |
|----|------------|------------|------------|
| H  | -3.2825029 | -3.7967130 | -3.1194532 |
| C  | -1.2936763 | -3.6719381 | -1.0094108 |
| H  | -1.4666937 | -4.6889190 | -1.3424545 |
| Gd | -0.0558425 | 0.0110611  | -0.4000754 |
| N  | -0.3600938 | -0.0234925 | -3.2395521 |
| O  | -0.4873899 | -0.0384499 | -4.4190670 |
| O  | -0.9089244 | 0.8414347  | -2.5131471 |
| O  | 0.3332237  | -0.8715266 | -2.6254836 |

## Lu-Complexes

Table S42: Optimised geometry of the **Lu<sup>(III)</sup>-pent0** complex with the BHLYP/def2-SVP model chemistry.

| Atom | X          | Y          | Z         |
|------|------------|------------|-----------|
| C    | 2.5782298  | 1.4563860  | 0.5653999 |
| C    | 3.7435412  | 1.2079690  | 1.3523998 |
| C    | 3.9311852  | -0.1598206 | 1.3710273 |
| C    | 2.8788078  | -0.7334374 | 0.5952103 |
| N    | 2.1563380  | 0.2769278  | 0.0515580 |
| H    | 4.3227883  | 1.9447565  | 1.8921437 |
| H    | 4.6855604  | -0.6987233 | 1.9280090 |
| C    | 1.5873705  | 2.4874919  | 0.5504793 |
| C    | 1.3913280  | 3.6780953  | 1.3135983 |
| N    | 0.3905736  | 2.1004550  | 0.0478912 |
| C    | 0.0336335  | 3.9222405  | 1.3307066 |
| H    | 2.1541899  | 4.2371142  | 1.8382041 |
| C    | -0.5828446 | 2.8764302  | 0.5787530 |
| H    | -0.4741220 | 4.7091757  | 1.8716301 |
| C    | 2.2001271  | -1.9907859 | 0.6071290 |
| C    | 2.3259996  | -3.1773864 | 1.3941802 |
| N    | 0.9481524  | -1.9502235 | 0.0937540 |
| C    | 1.0850314  | -3.7765896 | 1.4122008 |
| H    | 3.2073793  | -3.5010560 | 1.9308858 |
| C    | 0.2150950  | -2.9487127 | 0.6362200 |
| H    | 0.8032341  | -4.6617013 | 1.9660806 |
| C    | -1.1931953 | -2.7005191 | 0.6612307 |

|    |            |            |            |
|----|------------|------------|------------|
| C  | -2.2674418 | -3.1677880 | 1.4763394  |
| N  | -1.5548474 | -1.5082366 | 0.1262473  |
| C  | -3.2239730 | -2.1718681 | 1.4880656  |
| H  | -2.2927799 | -4.0920958 | 2.0373779  |
| C  | -2.7236207 | -1.1076854 | 0.6794031  |
| H  | -4.1418475 | -2.1667886 | 2.0600609  |
| C  | -1.8740131 | 2.2575452  | 0.6208860  |
| C  | -3.0287656 | 2.4279449  | 1.4387933  |
| N  | -1.9054567 | 1.0049138  | 0.0978654  |
| C  | -3.6821435 | 1.2102140  | 1.4690882  |
| H  | -3.2972447 | 3.3167549  | 1.9934303  |
| C  | -2.9206806 | 0.3106440  | 0.6677534  |
| H  | -4.5594735 | 0.9651697  | 2.0521697  |
| Lu | -0.0004844 | -0.0299645 | -0.7520923 |
| O  | 1.5291518  | 0.0992600  | -2.6361221 |
| H  | 1.5503953  | -0.7260513 | -3.1213510 |
| O  | -0.8140138 | -1.3979231 | -2.6325335 |
| H  | -1.3490060 | -0.7748468 | -3.1290665 |
| H  | 2.3213572  | 0.1301272  | -2.0873742 |
| H  | -1.4223358 | -1.9568185 | -2.1405337 |
| O  | -1.1624166 | 1.3146163  | -2.5635812 |
| H  | -0.6176824 | 2.0592978  | -2.8193397 |
| H  | -1.7851548 | 1.6454812  | -1.9041599 |

Table S43: Optimised geometry of the **Lu<sup>(III)</sup>-porph1212** complex with the BHLYP/def2-SVP model chemistry.

| Atom | X            | Y            | Z            |
|------|--------------|--------------|--------------|
| C    | 2.983715600  | 1.404764000  | 0.211024800  |
| C    | 4.255688000  | 1.116185900  | -0.362170800 |
| C    | 4.170122800  | -0.152287300 | -0.855024100 |
| C    | 2.868771600  | -0.626825400 | -0.528998300 |
| N    | 2.152198100  | 0.369854000  | 0.111478200  |
| H    | 5.095129300  | 1.797070000  | -0.396599200 |
| H    | 4.932777900  | -0.726520800 | -1.364747000 |
| C    | 0.452134300  | 3.271241500  | -0.117609200 |
| C    | -0.085179600 | 4.297151000  | -0.939584900 |
| N    | -0.273845300 | 2.150306900  | -0.190854200 |
| C    | -1.172276100 | 3.752810800  | -1.566815200 |
| H    | 0.324571800  | 5.292235600  | -1.047297300 |
| C    | -1.299297500 | 2.427332200  | -1.077586800 |
| H    | -1.838843100 | 4.221558600  | -2.279153900 |
| C    | 1.382968100  | -2.664838000 | -0.267805900 |
| C    | 1.328588600  | -4.075058100 | -0.360123200 |
| N    | 0.270158200  | -2.183245600 | 0.385539200  |
| C    | 0.183979600  | -4.462727400 | 0.285837200  |
| H    | 2.076137500  | -4.699991600 | -0.830883700 |
| C    | -0.454342100 | -3.269961800 | 0.701927800  |
| H    | -0.198593200 | -5.463971500 | 0.431257700  |
| C    | -2.822806600 | 0.415542200  | -0.841206500 |
| C    | -4.118428800 | -0.098408500 | -1.109392100 |
| N    | -2.165385800 | -0.395540200 | 0.064838500  |

|    |              |              |              |
|----|--------------|--------------|--------------|
| C  | -4.265872900 | -1.206333500 | -0.324824500 |
| H  | -4.835578400 | 0.341792900  | -1.789929700 |
| C  | -3.030663100 | -1.370999900 | 0.358647000  |
| H  | -5.119189000 | -1.866062800 | -0.245230500 |
| C  | 2.496198200  | -1.942551200 | -0.696330700 |
| H  | 3.239804400  | -2.550193400 | -1.203636400 |
| C  | -2.829215700 | -2.530873100 | 1.212064200  |
| C  | -1.755813600 | -3.329325600 | 1.342338600  |
| H  | -3.742748700 | -2.878747100 | 1.689700700  |
| H  | -1.910308300 | -4.239296300 | 1.918806100  |
| C  | 1.649737300  | 3.490288600  | 0.681472800  |
| C  | 2.715635300  | 2.699988000  | 0.822076200  |
| H  | 1.714000900  | 4.481555700  | 1.125303600  |
| H  | 3.558021200  | 3.107268700  | 1.376538700  |
| C  | -2.397159500 | 1.629530600  | -1.356820400 |
| H  | -3.090587100 | 2.070642500  | -2.066999700 |
| O  | -0.933455900 | -0.965110400 | 3.017757900  |
| H  | -0.190428200 | -1.495721800 | 3.337722800  |
| H  | -1.673061400 | -1.563005100 | 2.838901700  |
| O  | -1.568327700 | 1.560271700  | 2.269380700  |
| H  | -1.125332800 | 1.707584500  | 3.114601300  |
| H  | -1.617214500 | 2.407662500  | 1.814379600  |
| N  | 1.788990500  | 0.317037700  | 3.303591100  |
| O  | 1.643611100  | -0.798902800 | 2.764965700  |
| O  | 1.010499300  | 1.215765800  | 2.873464500  |
| O  | 2.586823200  | 0.534102000  | 4.152515600  |
| Lu | -0.017853700 | 0.101042000  | 1.095032700  |



Table S44: Optimised geometry of the **Lu<sup>(III)</sup>-porph1122** complex with the BHLYP/def2-SVP model chemistry.

| Atom | X            | Y            | Z            |
|------|--------------|--------------|--------------|
| C    | 2.856706400  | 1.630494800  | 0.187213900  |
| C    | 3.962518200  | 1.743050400  | -0.687763000 |
| C    | 4.146056500  | 0.495555700  | -1.216535300 |
| C    | 3.160180200  | -0.351806700 | -0.643773900 |
| N    | 2.339977500  | 0.399699700  | 0.192305100  |
| H    | 4.542158000  | 2.640244600  | -0.855150400 |
| H    | 4.921160200  | 0.168352500  | -1.897442300 |
| C    | 0.253791800  | 3.261959200  | 0.095928800  |
| C    | -0.384128400 | 4.307925100  | -0.631517800 |
| N    | -0.352505400 | 2.091396900  | -0.076397000 |
| C    | -1.436030400 | 3.728784900  | -1.277318200 |
| H    | -0.069526400 | 5.342472000  | -0.647775200 |
| C    | -1.436622900 | 2.353368100  | -0.901634600 |
| H    | -2.167040000 | 4.197296300  | -1.923666900 |
| C    | 1.494104900  | -3.116308800 | 0.390137000  |
| C    | 1.181511900  | -4.491943000 | 0.778262100  |
| N    | 0.401089200  | -2.335751400 | 0.504672600  |
| C    | -0.126307200 | -4.534432900 | 1.058455800  |
| H    | 1.899742700  | -5.300729200 | 0.781254600  |
| C    | -0.639226500 | -3.195486300 | 0.813569400  |
| H    | -0.732831500 | -5.384812700 | 1.341278000  |
| C    | -2.757253400 | 0.220782100  | -0.699128000 |
| C    | -3.982694600 | -0.457243800 | -0.925626700 |
| N    | -1.897652300 | -0.575891600 | 0.017827500  |

|    |              |              |              |
|----|--------------|--------------|--------------|
| C  | -3.867945500 | -1.682638300 | -0.325805100 |
| H  | -4.825465500 | -0.058515000 | -1.475378100 |
| C  | -2.554073900 | -1.733239300 | 0.211628600  |
| H  | -4.590192600 | -2.487392100 | -0.299053900 |
| C  | 2.740954400  | -2.858114600 | -0.176062900 |
| C  | 3.320246800  | -1.730899600 | -0.735392900 |
| H  | 3.336421500  | -3.757250300 | -0.298410000 |
| H  | 4.193300300  | -1.975677100 | -1.336359100 |
| C  | -1.971758600 | -2.920429800 | 0.751764500  |
| H  | -2.651958600 | -3.741506200 | 0.952102800  |
| C  | 1.375728400  | 3.481529500  | 1.001590500  |
| C  | 2.471474600  | 2.739209600  | 1.077398500  |
| H  | 1.285096100  | 4.342249000  | 1.660980000  |
| H  | 3.222586700  | 3.008154500  | 1.818240900  |
| C  | -2.498619100 | 1.512145800  | -1.154844100 |
| H  | -3.287860600 | 1.944094600  | -1.763165800 |
| O  | -1.465003400 | 1.285564000  | 2.324713200  |
| H  | -1.792370700 | 0.705654600  | 3.023011700  |
| H  | -2.207907800 | 1.591390500  | 1.795058800  |
| O  | -0.926353200 | -1.203507600 | 3.008399700  |
| H  | -1.420267800 | -1.964809800 | 2.669470800  |
| H  | -0.089052800 | -1.546835000 | 3.364850900  |
| N  | 1.945974200  | -0.002924300 | 3.362881800  |
| O  | 1.689433400  | -1.107963000 | 2.825234200  |
| O  | 1.217920400  | 0.945717900  | 2.975769500  |
| O  | 2.800865400  | 0.140032400  | 4.170511000  |
| Lu | 0.174386900  | -0.005854700 | 1.119295500  |

Table S45: Optimised geometry of the **Lu<sup>(III)</sup>-sapphyrin** complex with the BHLYP/def2-SVP model chemistry.

| Atom | X            | Y            | Z            |
|------|--------------|--------------|--------------|
| C    | -0.437539500 | -2.140122900 | 2.703693200  |
| C    | -0.580482300 | -3.544639600 | 2.894327900  |
| C    | -0.292823900 | -4.138354700 | 1.691697700  |
| C    | -0.012340400 | -3.077226600 | 0.794688500  |
| N    | -0.138607000 | -1.874563000 | 1.401236000  |
| H    | -0.821851700 | -4.027617200 | 3.832396600  |
| H    | -0.271156300 | -5.194029300 | 1.457860700  |
| C    | -0.362357000 | -1.194070200 | 3.722213700  |
| H    | -0.558150300 | -1.546295100 | 4.729488200  |
| C    | 0.069999800  | 0.112148500  | 3.609777700  |
| C    | 0.360955300  | 0.906056500  | 4.767009300  |
| N    | 0.342545900  | 0.828635000  | 2.458245900  |
| C    | 0.829158000  | 2.095861400  | 4.321625200  |
| H    | 0.225791400  | 0.576171800  | 5.788963300  |
| C    | 0.749070400  | 2.050537800  | 2.888973300  |
| H    | 1.142647100  | 2.956660700  | 4.897218300  |
| C    | 0.871089300  | 3.213855400  | 2.128590900  |
| H    | 1.194168000  | 4.093626700  | 2.673833800  |
| C    | 0.356509400  | 3.448759900  | 0.869420700  |
| C    | 0.056049500  | 4.796229200  | 0.447246400  |
| N    | -0.091338300 | 2.543650500  | -0.049034600 |
| C    | -0.661977600 | 4.690848400  | -0.686699500 |
| H    | 0.324450200  | 5.687948700  | 0.998281400  |
| C    | -0.695141700 | 3.287568300  | -1.026403500 |

|    |              |              |              |
|----|--------------|--------------|--------------|
| H  | -1.094691100 | 5.478900600  | -1.288950400 |
| C  | -1.130241300 | 2.894657500  | -2.273674600 |
| H  | -1.599154600 | 3.670929200  | -2.868333700 |
| C  | -0.805686800 | 1.726235300  | -2.968768300 |
| C  | -0.885617000 | 1.665484200  | -4.399452800 |
| N  | -0.200218000 | 0.622267400  | -2.464956800 |
| C  | -0.230051700 | 0.537424600  | -4.771050600 |
| H  | -1.337861100 | 2.420434700  | -5.029036200 |
| C  | 0.170640600  | -0.122304800 | -3.565111600 |
| H  | -0.054078000 | 0.160401200  | -5.770350000 |
| C  | 0.400446100  | -3.099246600 | -0.553809200 |
| C  | 0.738560900  | -4.198231300 | -1.387179600 |
| N  | 0.506787500  | -1.927331400 | -1.212218600 |
| C  | 1.049980900  | -3.657898500 | -2.605370900 |
| H  | 0.736000700  | -5.240798100 | -1.099855400 |
| C  | 0.851875800  | -2.248612400 | -2.492404100 |
| H  | 1.330550600  | -4.178852800 | -3.511770200 |
| C  | 0.747092900  | -1.382391600 | -3.572932300 |
| H  | 1.000329100  | -1.786367600 | -4.547716800 |
| Lu | 0.296457400  | 0.151883000  | 0.048463700  |
| O  | 2.259798100  | 0.768871700  | -1.061530800 |
| H  | 2.974227900  | 0.134816900  | -0.935686000 |
| H  | 2.062008500  | 0.874054900  | -2.000759000 |
| O  | 2.404808200  | -0.669486100 | 1.095559400  |
| H  | 2.109378300  | -1.563346900 | 1.316879300  |
| H  | 2.335297300  | -0.171658100 | 1.922829400  |
| O  | -1.966909300 | -0.218067700 | -0.288336400 |

|   |              |              |              |
|---|--------------|--------------|--------------|
| H | -2.065441400 | -0.198334700 | -1.251687300 |
| H | -2.204840600 | -1.096523100 | 0.033174400  |

Table S46: Optimised geometry of the **Lu<sup>(III)</sup>-porph2** complex with the BHLYP/def2-SVP model chemistry.

| Atom | X            | Y            | Z            |
|------|--------------|--------------|--------------|
| C    | 2.741503900  | 0.978259900  | -0.584896400 |
| C    | 4.177610900  | 0.813394600  | -0.565734500 |
| C    | 4.457495800  | -0.011367300 | 0.460027000  |
| C    | 3.187860800  | -0.474509200 | 0.965467700  |
| N    | 2.161067100  | 0.160745900  | 0.346982400  |
| H    | 4.864200400  | 1.326910900  | -1.225256600 |
| H    | 5.421463900  | -0.347537300 | 0.816843300  |
| C    | -0.072581900 | 2.942694100  | -0.691895200 |
| C    | -0.727733600 | 4.225472600  | -0.736719300 |
| N    | -0.782241700 | 2.079992500  | 0.107540400  |
| C    | -1.790517900 | 4.151665700  | 0.089573800  |
| H    | -0.380504200 | 5.072578700  | -1.312937100 |
| C    | -1.857584300 | 2.783254600  | 0.529621100  |
| H    | -2.521775900 | 4.913772400  | 0.322223600  |
| C    | 1.310876800  | -3.053811600 | 1.200720400  |
| C    | 1.213701600  | -4.439202900 | 0.885424000  |
| N    | 0.564679700  | -2.309161700 | 0.316436000  |
| C    | 0.533834500  | -4.510554000 | -0.296858100 |
| H    | 1.704689100  | -5.238986700 | 1.424629100  |
| C    | 0.116734400  | -3.185446400 | -0.603243700 |
| H    | 0.314123500  | -5.386967400 | -0.892072900 |
| C    | -3.444483100 | -0.019722900 | 0.313135800  |
| C    | -4.536152500 | -0.678402100 | -0.316695500 |
| N    | -2.247731700 | -0.491814000 | -0.172106400 |

|   |              |              |              |
|---|--------------|--------------|--------------|
| C | -3.993947800 | -1.446452500 | -1.303508800 |
| H | -5.581734200 | -0.496430300 | -0.105416700 |
| C | -2.581642100 | -1.349514300 | -1.158451700 |
| H | -4.504372500 | -2.055785400 | -2.037413100 |
| C | 2.368609900  | -2.621652900 | 2.020119500  |
| C | 3.195817600  | -1.534853500 | 1.892929600  |
| H | 2.719010200  | -3.381819100 | 2.713641700  |
| H | 4.114280700  | -1.590318300 | 2.469774200  |
| C | -1.768514900 | -2.179563700 | -1.996395000 |
| C | -0.681801400 | -2.948611900 | -1.766656200 |
| H | -2.247597900 | -2.368472400 | -2.954379000 |
| H | -0.452878000 | -3.649226000 | -2.566833900 |
| C | 1.107639400  | 2.802414200  | -1.406825500 |
| C | 2.232556800  | 1.980772700  | -1.397205700 |
| H | 1.240418500  | 3.638438500  | -2.087859800 |
| H | 2.984570300  | 2.328054200  | -2.099469000 |
| C | -3.726885900 | 1.152680400  | 1.037249200  |
| C | -3.054419500 | 2.348850300  | 1.149460700  |
| H | -4.744448400 | 1.176565100  | 1.419750000  |
| H | -3.634013000 | 3.158460100  | 1.583521700  |
| N | 1.418663800  | 0.846778900  | 3.302974100  |
| O | 0.972130500  | -0.311383100 | 3.082779500  |
| O | 0.943384200  | 1.739035800  | 2.570457400  |
| O | -1.460086000 | 0.784879100  | 2.918375800  |
| H | -0.900561500 | 1.548561400  | 3.128816000  |
| H | -2.333655500 | 1.130586200  | 2.687100100  |
| O | 2.226506700  | 1.055178900  | 4.146883800  |

|    |              |              |             |
|----|--------------|--------------|-------------|
| O  | -1.219031300 | -1.742163700 | 2.420774100 |
| H  | -0.758122300 | -2.588933400 | 2.391101000 |
| H  | -1.132323100 | -1.375233100 | 3.309184300 |
| Lu | -0.156848800 | -0.087661600 | 1.046032800 |



Table S47: Optimised geometry of the **Lu<sup>(III)</sup>-amethyryn** complex with the BHLYP/def2-SVP model chemistry.

| Atom | X            | Y            | Z           |
|------|--------------|--------------|-------------|
| C    | 3.746076800  | -1.174605500 | 0.501073400 |
| C    | 4.426592000  | -2.438440400 | 0.534364700 |
| C    | 3.469280100  | -3.401358400 | 0.489116900 |
| C    | 2.224327300  | -2.701087500 | 0.429713000 |
| N    | 2.399801500  | -1.369360200 | 0.439628100 |
| H    | 5.499155100  | -2.564622900 | 0.585973600 |
| H    | 3.596863400  | -4.473861200 | 0.495482800 |
| C    | 3.713274100  | 1.273881000  | 0.503920600 |
| C    | 4.359572900  | 2.555579700  | 0.538884300 |
| N    | 2.362256100  | 1.432455800  | 0.442964700 |
| C    | 3.376720100  | 3.492400300  | 0.494690300 |
| H    | 5.428354300  | 2.710522000  | 0.590616700 |
| C    | 2.151023100  | 2.758882800  | 0.434283500 |
| H    | 3.475401700  | 4.567934200  | 0.502225800 |
| C    | 0.839291100  | 3.241929700  | 0.377980700 |
| C    | 0.394722600  | 4.596819600  | 0.365554400 |
| N    | -0.192597500 | 2.372386300  | 0.345825000 |
| C    | -0.963940500 | 4.535173100  | 0.331308300 |
| H    | 1.024859700  | 5.473913100  | 0.384172400 |
| C    | -1.309690400 | 3.146347900  | 0.329891400 |
| H    | -1.664951900 | 5.356713600  | 0.319214100 |
| C    | -2.611422000 | 2.635590200  | 0.356010400 |
| C    | -3.861792700 | 3.395704500  | 0.324092200 |
| N    | -2.827823800 | 1.335450300  | 0.423962700 |

|    |              |              |              |
|----|--------------|--------------|--------------|
| C  | -4.836385800 | 2.467983100  | 0.370336000  |
| H  | -3.964581800 | 4.469680000  | 0.267084400  |
| H  | -5.907102600 | 2.620540400  | 0.359644000  |
| C  | 0.926026800  | -3.219218300 | 0.374048900  |
| C  | 0.518063600  | -4.585660800 | 0.360487700  |
| N  | -0.128857300 | -2.377769400 | 0.343882700  |
| C  | -0.841750600 | -4.560552300 | 0.327445100  |
| H  | 1.171592300  | -5.445511700 | 0.377513000  |
| H  | -1.520415800 | -5.400648000 | 0.314955300  |
| C  | -1.224775800 | -3.181456800 | 0.327844500  |
| C  | -4.157994300 | 1.171178500  | 0.425733300  |
| C  | -4.768373200 | -2.598101700 | 0.369311800  |
| C  | -3.769230700 | -3.499317300 | 0.322592000  |
| C  | -4.125008000 | -1.283596100 | 0.425445400  |
| H  | -5.834615800 | -2.779297800 | 0.358420500  |
| C  | -2.539708800 | -2.705941200 | 0.354946500  |
| N  | -2.790985800 | -1.412062500 | 0.423771900  |
| H  | -3.843150500 | -4.575634900 | 0.264903200  |
| C  | 4.372296000  | 0.058264900  | 0.529526300  |
| C  | -4.793727900 | -0.064923700 | 0.443270800  |
| H  | 5.454657200  | 0.072678100  | 0.577064800  |
| H  | -5.878127200 | -0.079492800 | 0.438729100  |
| Lu | 0.469807400  | 0.006199500  | 0.003558900  |
| N  | 0.156624000  | 0.006253800  | -2.686851400 |
| O  | -0.822548700 | -0.014280600 | -1.902033400 |
| O  | 1.277690800  | 0.025554200  | -2.090878000 |
| O  | 0.058035900  | 0.007702200  | -3.859735200 |

Table S48: Optimised geometry of the **Lu<sup>(III)</sup>-isoamethyrin** complex with the BHLYP/def2-SVP model chemistry.

| Atom | X            | Y            | Z            |
|------|--------------|--------------|--------------|
| C    | 3.792340600  | -0.346075600 | -0.107282300 |
| C    | 5.082108200  | -1.011870800 | -0.137193700 |
| C    | 4.823760200  | -2.294293100 | 0.206053300  |
| C    | 3.383645000  | -2.366543900 | 0.416626900  |
| N    | 2.810977000  | -1.186603700 | 0.213824400  |
| H    | 6.035513900  | -0.563696300 | -0.378464300 |
| H    | 5.522689000  | -3.114116000 | 0.301993600  |
| C    | 3.480937700  | 1.006195400  | -0.214520200 |
| C    | 4.395300300  | 2.125124300  | -0.294239500 |
| N    | 2.219210700  | 1.429154000  | -0.019665400 |
| C    | 3.653354400  | 3.234314000  | -0.067142000 |
| H    | 5.460796100  | 2.057823200  | -0.461135200 |
| C    | 2.304031600  | 2.763088000  | 0.126433900  |
| H    | 3.982061700  | 4.262477500  | -0.015960300 |
| C    | 1.144754600  | 3.428825800  | 0.501777200  |
| C    | 0.834938100  | 4.798662900  | 0.760753500  |
| N    | 0.036553700  | 2.665216700  | 0.614426300  |
| C    | -0.510153600 | 4.841916300  | 1.004323000  |
| H    | 1.531320900  | 5.624987500  | 0.746320800  |
| C    | -0.974566900 | 3.495894500  | 0.876542500  |
| H    | -1.116106700 | 5.709769300  | 1.221646700  |
| C    | -2.260373900 | 2.935175100  | 0.798116300  |
| C    | -3.544904200 | 3.555477700  | 0.845319600  |
| N    | -2.336549400 | 1.636385100  | 0.466688900  |

|    |              |              |              |
|----|--------------|--------------|--------------|
| C  | -4.426959300 | 2.584817400  | 0.483561600  |
| H  | -3.746032000 | 4.587526400  | 1.093900500  |
| H  | -5.500911800 | 2.660492500  | 0.382738800  |
| C  | 1.268972500  | -3.584607300 | 0.779747500  |
| C  | 0.605935800  | -4.871881700 | 0.876090000  |
| N  | 0.354156200  | -2.594828800 | 0.538653200  |
| C  | -0.695796600 | -4.650943600 | 0.611430900  |
| H  | 1.101729300  | -5.811685700 | 1.076606800  |
| H  | -1.500062200 | -5.369092300 | 0.562213300  |
| C  | -0.801446300 | -3.220031500 | 0.404143500  |
| C  | -3.654676500 | 1.398149700  | 0.250112900  |
| C  | -4.148258800 | -2.256124900 | -0.412238200 |
| C  | -3.230015000 | -3.230516100 | -0.196949500 |
| C  | -3.469831700 | -1.010648600 | -0.229442700 |
| H  | -5.200631600 | -2.360532000 | -0.636419000 |
| C  | -2.002697300 | -2.554380600 | 0.077894400  |
| N  | -2.136071100 | -1.216182000 | 0.026142400  |
| H  | -3.373262900 | -4.299693500 | -0.221888100 |
| C  | -4.169186200 | 0.180330100  | -0.145651800 |
| H  | -5.234442700 | 0.130333800  | -0.339306100 |
| Lu | -0.213548800 | 0.389116500  | -0.043924300 |
| C  | 2.645510100  | -3.501687700 | 0.756414000  |
| H  | 3.189814000  | -4.422441500 | 0.936078500  |
| O  | -0.074036000 | 0.325012900  | -3.921601200 |
| O  | -0.658420300 | 1.246127600  | -2.070706500 |
| O  | 0.386528100  | -0.584274900 | -2.031876000 |
| N  | -0.109508600 | 0.323197200  | -2.745171600 |

Table S49: Optimised geometry of the **Lu<sup>(III)</sup>-pent1** complex with the BHLYP/def2-SVP model chemistry.

| Atom | X          | Y          | Z          |
|------|------------|------------|------------|
| C    | 1.2034492  | -1.3428876 | -3.9115582 |
| C    | 0.8786700  | -2.6140559 | -3.3266179 |
| C    | -0.0585393 | -3.1702575 | -4.1341587 |
| C    | -0.1931277 | -2.2860679 | -5.2574813 |
| N    | 0.5576760  | -1.1671326 | -5.0837131 |
| H    | 1.2767531  | -2.9945121 | -2.3962083 |
| H    | -0.5686827 | -4.1166563 | -4.0195276 |
| C    | 1.9422814  | -0.3757018 | -3.2223209 |
| H    | 2.5044389  | -0.7259965 | -2.3641701 |
| C    | 1.7740668  | 0.9884200  | -3.3234179 |
| C    | 2.0818300  | 1.8357606  | -2.1934070 |
| N    | 0.9948660  | 1.6526998  | -4.2281270 |
| C    | 1.3454710  | 2.9528710  | -2.3552542 |
| H    | 2.7058115  | 1.5522949  | -1.3571356 |
| C    | 0.6845530  | 2.8204615  | -3.6320505 |
| H    | 1.2471129  | 3.8006072  | -1.6916508 |
| C    | -0.1642097 | 3.8126459  | -4.1215610 |
| H    | -0.4662745 | 4.5773867  | -3.4162262 |
| C    | -0.5138146 | 4.0152651  | -5.4366745 |
| C    | -1.1681814 | 5.2328010  | -5.8700526 |
| N    | -0.0717958 | 3.2973140  | -6.5042120 |
| C    | -1.0120152 | 5.2887576  | -7.2041371 |
| H    | -1.6254056 | 5.9563282  | -5.2096605 |
| C    | -0.2846770 | 4.0939321  | -7.5801906 |

|    |            |            |             |
|----|------------|------------|-------------|
| H  | -1.3149279 | 6.0675501  | -7.8899931  |
| C  | 0.2766504  | 3.9494506  | -8.8326814  |
| C  | -0.7698999 | -2.7029575 | -6.4524171  |
| H  | -1.3588599 | -3.6122628 | -6.4186803  |
| H  | 0.1513761  | 4.7824335  | -9.5138593  |
| C  | 1.0423498  | 2.8885355  | -9.2995469  |
| C  | 1.7655184  | 2.9724814  | -10.5491054 |
| N  | 1.1435335  | 1.6548773  | -8.7580674  |
| C  | 2.2858021  | 1.7514635  | -10.7714172 |
| H  | 1.8335851  | 3.8589025  | -11.1642412 |
| C  | 1.8064551  | 0.9106051  | -9.6948809  |
| H  | 2.8628691  | 1.4053026  | -11.6177120 |
| C  | -0.3855008 | -2.2515579 | -7.7054485  |
| C  | -0.4171224 | -3.1122558 | -8.8580923  |
| N  | 0.3850488  | -1.1562192 | -7.9438485  |
| C  | 0.4607209  | -2.5825456 | -9.7432198  |
| H  | -0.9766714 | -4.0342479 | -8.9344956  |
| C  | 0.9187205  | -1.3476797 | -9.1637264  |
| H  | 0.7533485  | -2.9644756 | -10.7114291 |
| C  | 1.7481432  | -0.4575116 | -9.8565568  |
| H  | 2.2293519  | -0.8509743 | -10.7446419 |
| Lu | 0.3309303  | 0.8851591  | -6.5140180  |
| N  | -2.4293292 | 0.9300513  | -6.6209175  |
| O  | -1.7230000 | 1.0129505  | -7.6532394  |
| O  | -1.7694057 | 0.7667037  | -5.5578882  |
| O  | -3.6106201 | 0.9975811  | -6.6356020  |
| O  | 2.6395521  | 0.3265354  | -6.5622188  |

|   |           |            |            |
|---|-----------|------------|------------|
| H | 2.6787636 | -0.5604063 | -6.1956825 |
| H | 2.9835923 | 0.2725733  | -7.4555964 |

Table S50: Optimised geometry of the **Lu<sup>(III)</sup>-rosarin** complex with the BHLYP/def2-SVP model chemistry.

| Atom | X            | Y            | Z            |
|------|--------------|--------------|--------------|
| C    | 1.978787300  | 2.693912000  | -0.828247600 |
| C    | 2.281742600  | 4.075252500  | -0.957724100 |
| C    | 1.303629000  | 4.729280100  | -0.251461300 |
| C    | 0.416537400  | 3.729998000  | 0.231548100  |
| N    | 0.845481700  | 2.486497200  | -0.161449600 |
| H    | 3.143426200  | 4.500214100  | -1.453521900 |
| H    | 1.200102900  | 5.794760000  | -0.089119200 |
| C    | -0.732431600 | 3.968079800  | 0.975976900  |
| H    | -0.889741300 | 4.986220600  | 1.320474600  |
| C    | -1.767693500 | 3.071338500  | 1.174295500  |
| C    | -3.104810000 | 3.481840500  | 1.466121100  |
| N    | -1.778555900 | 1.808560600  | 0.610624700  |
| C    | -3.926093700 | 2.503101100  | 0.978577300  |
| H    | -3.387674400 | 4.428916400  | 1.908142300  |
| C    | -3.057042700 | 1.510123800  | 0.443765400  |
| H    | -5.006938100 | 2.477801600  | 0.970932100  |
| C    | -3.398406500 | 0.324993200  | -0.294500000 |
| C    | -4.643121900 | -0.037297900 | -0.861641800 |
| N    | -2.454322800 | -0.589322200 | -0.509355200 |
| C    | -4.435784400 | -1.266439600 | -1.442086900 |
| H    | -5.556571700 | 0.540266600  | -0.827715100 |
| C    | -3.087917500 | -1.618351900 | -1.164406400 |
| H    | -5.159744200 | -1.895401100 | -1.944371300 |
| C    | 2.892753200  | 1.588782800  | -0.978436400 |



|   |              |              |              |
|---|--------------|--------------|--------------|
| C | 4.246897400  | 1.650988900  | -1.404680100 |
| N | 2.616806800  | 0.462719100  | -0.324834800 |
| C | 4.842465900  | 0.534483000  | -0.882752000 |
| H | 4.706983600  | 2.457603200  | -1.958528800 |
| C | 3.829539700  | -0.178709600 | -0.182395000 |
| H | 5.885547000  | 0.249142300  | -0.935596100 |
| C | 4.069260700  | -1.169644200 | 0.750479000  |
| C | -2.638106800 | -2.933855400 | -1.119458600 |
| H | 5.106939100  | -1.447166600 | 0.911456200  |
| H | -3.266747200 | -3.686156500 | -1.586574500 |
| C | 3.115582200  | -1.874215300 | 1.473453400  |
| C | 3.395634600  | -3.018133700 | 2.267095400  |
| N | 1.772355500  | -1.824599300 | 1.177619900  |
| C | 2.216686400  | -3.712528300 | 2.385238600  |
| H | 4.373756700  | -3.301944200 | 2.634645600  |
| C | 1.265786800  | -2.963631700 | 1.649995100  |
| H | 2.048056100  | -4.664959200 | 2.868479600  |
| C | -1.590356000 | -3.391191000 | -0.345715800 |
| C | -1.445445000 | -4.743196000 | 0.078186200  |
| N | -0.657409100 | -2.597675500 | 0.288068100  |
| C | -0.447614300 | -4.756015000 | 1.014587500  |
| H | -2.050307000 | -5.573767400 | -0.262790900 |
| C | 0.025439300  | -3.417268800 | 1.078647000  |
| H | -0.054599500 | -5.600596700 | 1.563015400  |
| O | -0.242404900 | 0.455127700  | -2.129146300 |
| H | -0.010014200 | 1.387891000  | -2.238507300 |
| H | -1.197401500 | 0.359008700  | -2.256718100 |

|    |              |              |             |
|----|--------------|--------------|-------------|
| O  | 0.106684500  | 0.571631600  | 2.492587000 |
| H  | 0.874938600  | 0.477080100  | 3.065390800 |
| H  | -0.315587500 | 1.429687100  | 2.638082000 |
| Gd | 0.108134500  | -0.102636800 | 0.195112700 |

Table S51: Optimised geometry of the **Lu<sup>(III)</sup>-rubyrin** complex with the BHLYP/def2-SVP model chemistry.

| Atom | X            | Y            | Z            |
|------|--------------|--------------|--------------|
| C    | 1.832013000  | 3.276839000  | 0.739439100  |
| C    | 1.984097200  | 4.625482300  | 0.295296400  |
| C    | 1.242102700  | 4.728638200  | -0.847090900 |
| C    | 0.594448900  | 3.467249000  | -1.004244100 |
| N    | 0.977404400  | 2.591899500  | -0.036730900 |
| H    | 2.605483700  | 5.378544700  | 0.761926900  |
| H    | 1.109989300  | 5.592003700  | -1.486139700 |
| C    | -0.472762800 | 3.284359400  | -1.890762200 |
| H    | -0.609739300 | 4.056610000  | -2.642010600 |
| C    | -1.511005000 | 2.387054200  | -1.727995700 |
| C    | -2.846367100 | 2.700863700  | -2.131027500 |
| N    | -1.536685200 | 1.438805800  | -0.734524000 |
| C    | -3.678028700 | 2.024656100  | -1.277271600 |
| H    | -3.118960500 | 3.414955800  | -2.897323100 |
| C    | -2.819579200 | 1.273569600  | -0.434062300 |
| H    | -4.757819000 | 2.052768400  | -1.232659000 |
| C    | 2.737832900  | 2.721991200  | 1.694602200  |
| H    | 3.315589200  | 3.430218900  | 2.280338000  |
| C    | -3.125959600 | 0.390564700  | 0.664502500  |
| C    | -4.330586700 | 0.191555300  | 1.424819900  |
| N    | -2.171469200 | -0.424690900 | 1.031087500  |
| C    | -4.057606100 | -0.833557700 | 2.276807400  |
| H    | -5.254111300 | 0.743249000  | 1.317816500  |
| C    | -2.723476000 | -1.285727200 | 1.951625100  |

|    |              |              |              |
|----|--------------|--------------|--------------|
| H  | -4.726499700 | -1.304923900 | 2.985019600  |
| C  | 3.145895400  | 1.422085600  | 1.671789600  |
| C  | 4.500286700  | 0.987976500  | 1.930730900  |
| N  | 2.534448800  | 0.509279000  | 0.843330400  |
| C  | 4.716981700  | -0.085975000 | 1.123838800  |
| H  | 5.214927300  | 1.499424300  | 2.562291000  |
| C  | 3.463709100  | -0.327819800 | 0.461009700  |
| H  | 5.632468600  | -0.644286400 | 0.986445100  |
| C  | -2.313010500 | -2.583098800 | 2.022222500  |
| H  | -2.848218700 | -3.254528700 | 2.686462200  |
| C  | 3.085050800  | -1.273666600 | -0.559849700 |
| C  | 3.885646900  | -2.075258000 | -1.413273500 |
| N  | 1.784975300  | -1.453767600 | -0.762093100 |
| C  | 2.999179800  | -2.799206700 | -2.166929400 |
| H  | 4.966023800  | -2.103054900 | -1.440500900 |
| C  | 1.693716000  | -2.459174700 | -1.693616500 |
| H  | 3.220489500  | -3.558030100 | -2.906284400 |
| C  | -1.473566100 | -3.195079900 | 1.041499900  |
| C  | -1.653272300 | -4.567154500 | 0.688610900  |
| N  | -0.674699800 | -2.558944000 | 0.170354600  |
| C  | -0.989945300 | -4.739064800 | -0.493161500 |
| H  | -2.240656900 | -5.289956900 | 1.239521600  |
| C  | -0.356406700 | -3.490559200 | -0.767590400 |
| H  | -0.900011500 | -5.638798300 | -1.087825400 |
| C  | 0.648419300  | -3.362386200 | -1.732885300 |
| H  | 0.736254600  | -4.177764600 | -2.444867500 |
| Lu | 0.164365500  | 0.026836100  | 0.413338200  |

|   |             |              |             |
|---|-------------|--------------|-------------|
| N | 0.257432400 | 0.103943400  | 3.146829200 |
| O | 0.452574600 | -0.947617200 | 2.484613500 |
| O | 0.015623600 | 1.116881300  | 2.441134900 |
| O | 0.297661700 | 0.137382900  | 4.328090700 |

Table S52: Optimised geometry of the **Lu<sup>(III)</sup>-hex1** complex with the BHLYP/def2-SVP model chemistry.

| Atom | X          | Y          | Z          |
|------|------------|------------|------------|
| C    | 2.8281326  | 0.7727812  | -2.2071189 |
| C    | 3.2534514  | 1.6178195  | -3.3096840 |
| C    | 2.4658696  | 2.7140507  | -3.2611593 |
| C    | 1.5819288  | 2.5187390  | -2.1263512 |
| N    | 1.7454739  | 1.2773862  | -1.6127607 |
| H    | 4.0880140  | 1.4186022  | -3.9675440 |
| H    | 2.5178996  | 3.6061361  | -3.8699042 |
| C    | 1.0169231  | 3.5337813  | -1.3848501 |
| H    | 1.1092519  | 4.5480981  | -1.7557879 |
| C    | 0.5744685  | 3.3723755  | -0.0613950 |
| C    | 0.6068738  | 4.4311843  | 0.9109537  |
| N    | 0.1357531  | 2.2235283  | 0.4985519  |
| C    | 0.2252709  | 3.8816073  | 2.0915545  |
| H    | 0.9075848  | 5.4508369  | 0.7134265  |
| C    | -0.1652931 | 2.5303280  | 1.7854837  |
| H    | 0.1209131  | 4.3632579  | 3.0539634  |
| C    | -1.1224606 | 1.8704219  | 2.5561362  |
| C    | 3.6419652  | -0.1718791 | -1.5726685 |
| H    | -1.2804734 | 2.2368829  | 3.5642612  |
| H    | 4.6126321  | -0.3752560 | -2.0092177 |
| C    | -2.1501920 | 1.1221695  | 1.9861819  |
| C    | -3.5035596 | 1.2310615  | 2.4654749  |
| N    | -2.1268032 | 0.6054557  | 0.7310076  |
| C    | -4.2956614 | 0.9276156  | 1.4064862  |

|   |            |            |            |
|---|------------|------------|------------|
| H | -3.7972945 | 1.5871218  | 3.4432856  |
| C | -3.4173221 | 0.5041343  | 0.3487299  |
| H | -5.3749768 | 0.9560016  | 1.3480533  |
| C | 3.4167435  | -0.6146967 | -0.2809744 |
| C | 4.4853337  | -1.0192106 | 0.6091009  |
| N | 2.2222804  | -0.6460408 | 0.3755950  |
| C | 3.9250039  | -1.2184103 | 1.8198617  |
| H | 5.5278549  | -1.0942831 | 0.3318045  |
| C | 2.4940342  | -1.0936039 | 1.6168260  |
| H | 4.4024441  | -1.5176016 | 2.7425999  |
| C | 1.5945771  | -1.7573384 | 2.4534089  |
| C | -3.8832398 | -0.0318432 | -0.8645933 |
| H | 1.9576504  | -2.0607754 | 3.4281754  |
| H | -4.9155530 | 0.1642481  | -1.1305237 |
| C | 0.5288179  | -2.4803376 | 1.9184824  |
| C | 0.2330594  | -3.8191350 | 2.3939673  |
| N | -0.0375864 | -2.2625848 | 0.7138844  |
| C | -0.3495100 | -4.4547786 | 1.3572349  |
| H | 0.5337834  | -4.2239915 | 3.3503049  |
| C | -0.5522809 | -3.4620607 | 0.3217402  |
| H | -0.6537659 | -5.4903133 | 1.2903233  |
| C | -3.2050023 | -1.0031559 | -1.5679088 |
| C | -3.8223373 | -1.9366645 | -2.4937795 |
| N | -2.0173451 | -1.4882349 | -1.1357526 |
| C | -3.0478210 | -3.0424674 | -2.4751013 |
| H | -4.7609001 | -1.7821450 | -3.0078761 |
| C | -1.9662692 | -2.7561448 | -1.5471917 |

|    |            |            |            |
|----|------------|------------|------------|
| H  | -3.2145193 | -3.9881704 | -2.9719353 |
| C  | -1.2418120 | -3.7272020 | -0.8489844 |
| H  | -1.4209130 | -4.7662310 | -1.0988629 |
| Lu | -0.0441219 | -0.0692370 | -0.4353141 |
| O  | 0.4240923  | -1.0654828 | -2.4994704 |
| N  | -0.2510918 | -0.2580976 | -3.1845570 |
| O  | -0.3377574 | -0.3377933 | -4.3648852 |
| O  | -0.8268973 | 0.6405971  | -2.5229291 |



## References

- (1) Shannon, R. D. Revised effective ionic radii and systematic studies of interatomic distances in halides and chalcogenides. *Acta. Crystallogr. A* **1976**, *32*, 751–767.
